# Supplementary material for: (Thio)urea-mediated benzoxazinone opening: mild approach towards synthesis of o-(substituted amido)benzamides
Source: Royal Society of Chemistry journal article supplement (doi:10.1039/c3ra45903a), 2013-11-22

## Electronic Supplementary Information

### (Thio)urea-Mediated Benzoxazinone Opening: Mild Approach Towards Synthesis of *o*-(substituted amido)benzamides

*Roshna V. Nair and Gangadhar J. Sanjayan\**

*Division of Organic Chemistry, National Chemical Laboratory, Dr. Homi Bhabha  
Road, Pune 411 008, India.*

|                                                   |         |
|---------------------------------------------------|---------|
| Contents                                          | S1      |
| General methods                                   | S2      |
| Synthetic Scheme                                  | S3      |
| Experimental procedures and References            | S4-S15  |
| Mass spectra of compounds                         | S16-S21 |
| <sup>1</sup> H NMR spectra of compounds           | S22-S29 |
| <sup>13</sup> C and DEPT-135 spectra of compounds | S30-S47 |

### **General Methods.**

Unless otherwise stated, all the chemicals and reagents were obtained commercially. Dry solvents were prepared by the standard procedures. Analytical Thin Layer Chromatography was done on precoated silica gel plates (Kieselgel 60F<sub>254</sub>, Merck). Unless otherwise stated Column Chromatographic purifications were done with 100-200 Mesh Silica gel. NMR spectra were recorded in CDCl<sub>3</sub> on AV 200 MHz, AV 400 MHz or AV 500 MHz spectrometers. All chemical shifts are reported in  $\delta$  ppm downfield to TMS and peak multiplicities as singlet (s), doublet (d), quartet (q), broad singlet (bs), and multiplet (m). The titration studies were done in CDCl<sub>3</sub>. Elemental analyses were performed on an Elmentar-Vario-EL (Heraeus Company Ltd., Germany). IR spectra were recorded in CHCl<sub>3</sub> using Shimadzu FTIR-8400 spectrophotometer. Melting points were determined on a Buchi Melting Point B-540. MALDI-TOF mass spectra were obtained from ABSCIEX TOF/TOF<sup>TM</sup> 5800 mass spectrometer.

**SCHEME: Synthesis of oxazinones 1a-e**

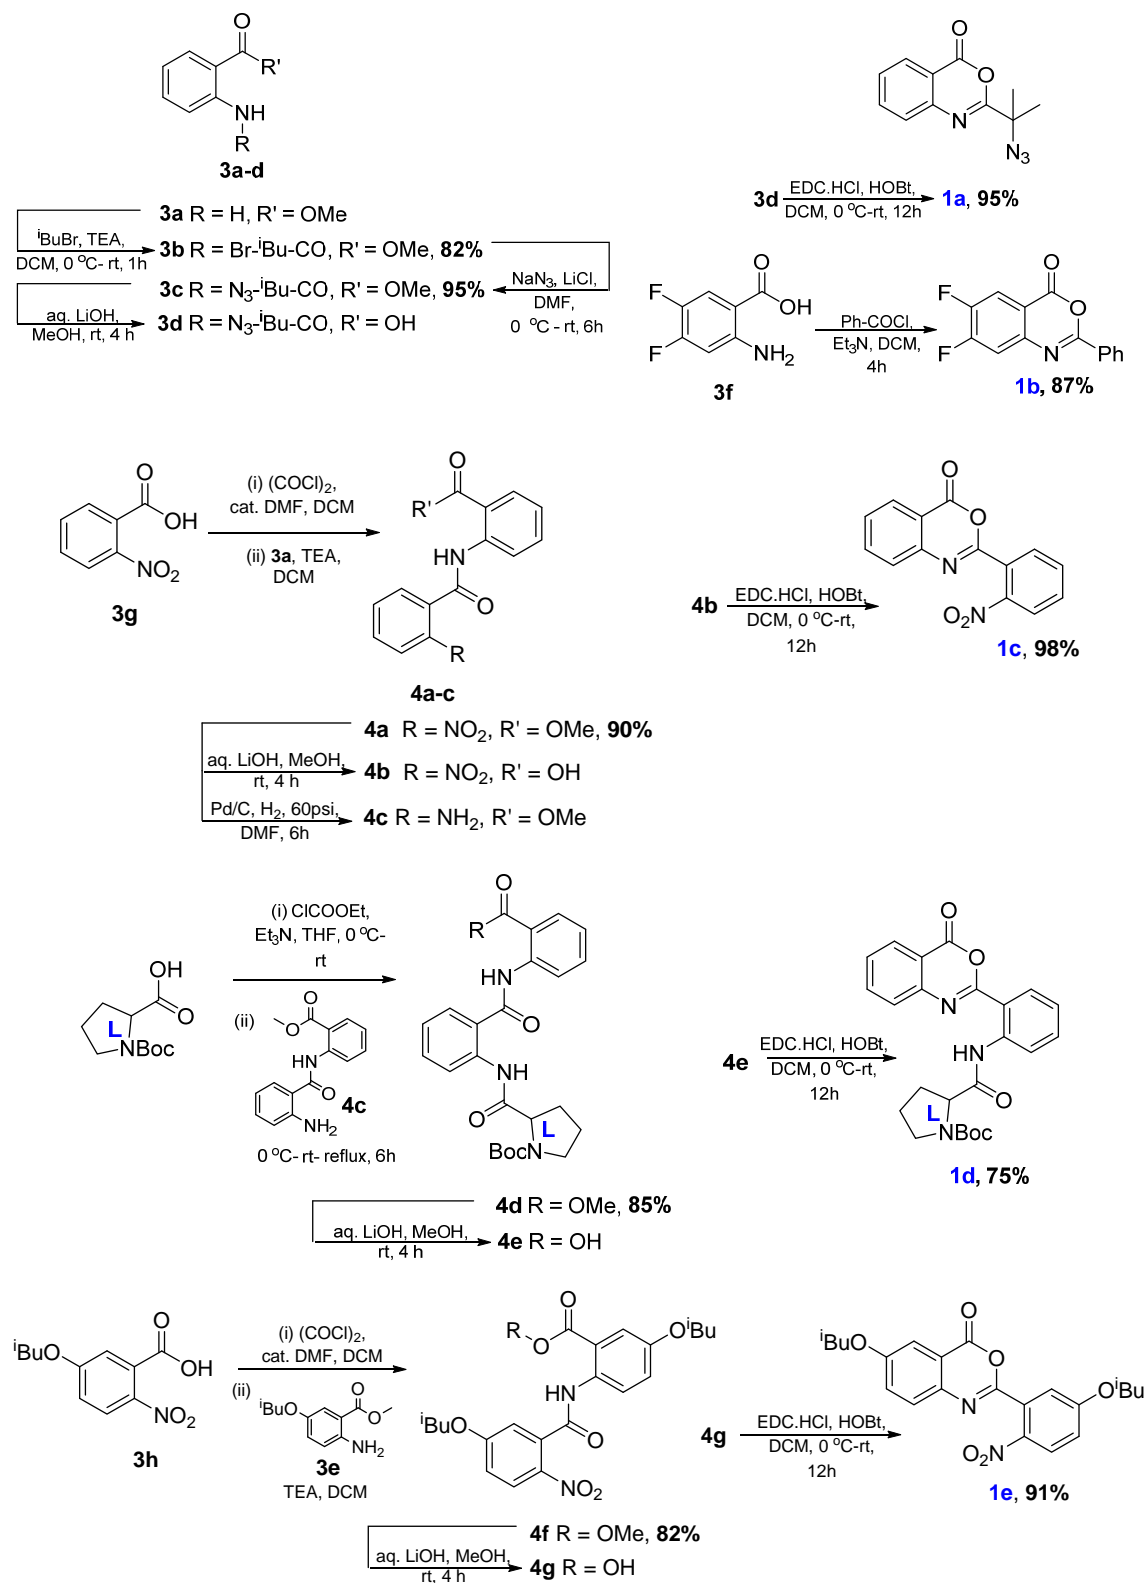

## Experimental Procedures:

### methyl 2-(2-bromo-2-methylpropanamido)benzoate **3b**:

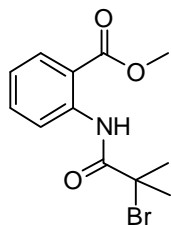

To an ice cold solution of anthranilic methyl ester (10 g, 72.99 mmol, 1 equiv) and triethylamine, TEA (12.95 mL, 99.89 mmol, 1.1 equiv) in dry DCM (100 mL) bromo isobutyryl bromide (9.92 mL, 80.29 mmol, 1.2 equiv) was slowly added. The reaction mixture was stirred for 1 hr at room temperature. After completion, the reaction mixture was diluted with DCM (100 mL) and washed sequentially with saturated NaHCO<sub>3</sub>, dil. HCl and brine solution. The organic layer was dried over Na<sub>2</sub>SO<sub>4</sub>, filtered and solvent was stripped off under reduced pressure. Column chromatographic purification (eluent: 10% AcOEt/pet. Ether, Rf: 0.3) of the residue afforded **3b** as a white solid (16.2g, 82%). mp: 44-45 °C; IR (CHCl<sub>3</sub>)  $\nu$  (cm<sup>-1</sup>): 3264, 3020, 2927, 2400, 1685, 1590, 1528, 1451, 1381, 1272, 1088, 1048, 967; <sup>1</sup>H NMR (200 MHz, CDCl<sub>3</sub>): 11.85 (s, 1H), 8.71-8.66 (dd, *J* = 1.01 Hz, *J* = 8.59 Hz, 1H), 8.06-8.01 (dd, *J* = 1.77 Hz, *J* = 8.08 Hz, 1H), 7.59-7.5 (m, 1H), 7.14-7.06 (m, 1H), 3.93 (s, 3H), 2.06 (s, 6H); <sup>13</sup>C NMR (50 MHz, CDCl<sub>3</sub>): 170.6, 168.3, 140.9, 134.4, 130.8, 122.9, 120.1, 115.4, 60.1, 52.4, 31.7; Anal. Calcd. For C<sub>12</sub>H<sub>14</sub>BrNO<sub>3</sub>: C, 48.02; H, 4.70; Br, 26.62; N, 4.67; Found: C, 48.10; H, 4.89; Br, 26.66; N, 4.29.

### methyl 2-(2-azido-2-methylpropanamido)benzoate **3c**:

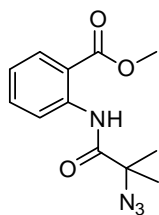

To a solution of **3b** (10 g, 34.85 mmol, 1 equiv) in dry DMSO (60 mL) was added sodium azide (3.40 g, 52.28 mmol, 1.5 equiv) and catalytic amount of LiCl (0.15g, 3.48 mmol, 0.1 equiv), the reaction mixture was allowed to proceed at rt for 6h. After completion, the reaction mixture was added to water and the aqueous layer was extracted with DCM. The combined organic layer was washed repeatedly with water and brine solution. The organic layer was dried over Na<sub>2</sub>SO<sub>4</sub>, filtered and solvent was stripped off under reduced pressure. . Column chromatographic purification (eluent: 10% AcOEt/pet. Ether, Rf: 0.3) of the residue afforded **3c** as a white solid (8 g, 88%). mp: 40-42 °C; IR (CHCl<sub>3</sub>)  $\nu$  (cm<sup>-1</sup>): 3261, 3020, 2980, 2956, 2401, 1694, 1605, 1589, 1525. 1450, 1386, 1275, 1217, 1166, 1089, 967, 920; <sup>1</sup>H NMR (200 MHz, CDCl<sub>3</sub>): 11.78 (s, 1H), 8.71-8.66 (d, *J* = 8.65 Hz, 1H), 8.04-8.0 (dd, *J* = 1.64 Hz, *J* = 7.96 Hz, 1H), 7.56-7.47 (m, 1H), 7.13-7.05 (m, 1H),

3.93 (bs, 3H), 1.6 (bs, 6H);  $^{13}\text{C}$  NMR (50 MHz,  $\text{CDCl}_3$ ): 171.5, 168.1, 140.5, 134.3, 130.8, 122.9, 120.2, 115.7, 64.7, 52.3, 24.5; Anal. Calcd. For  $\text{C}_{12}\text{H}_{14}\text{N}_4\text{O}_3$ : C, 54.96; H, 5.38; N, 21.36; Found: C, 54.81; H, 5.23; N, 21.38.

**General Procedures for 3d, 4b, 4e and 4g:**

**2-(2-azido-2-methylpropanamido)benzoic acid 3d:**

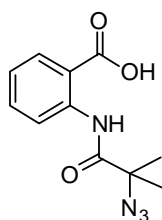

To a solution of **3c** (6.97 g, 27.88 mmol, 1 equiv.) in methanol (25 mL) and water (10 mL),  $\text{LiOH}\cdot\text{H}_2\text{O}\cdot 2\text{H}_2\text{O}$  (5.02 g, 8.64 mmol, 3 equiv.) was added and the reaction mixture was stirred for 18 hrs. The solvent was stripped off under reduced pressure. To the residue water (50 mL) was added and acidified with dilute HCl. The water layer was extracted with ethyl acetate (3 x 50 mL). The combined organic layer was washed with water and brine solution, dried over  $\text{Na}_2\text{SO}_4$  and used for next reaction without further purification. Yield = 6.4 g (97.3%).

**methyl 2-(2-nitrobenzamido)benzoate 4b:**

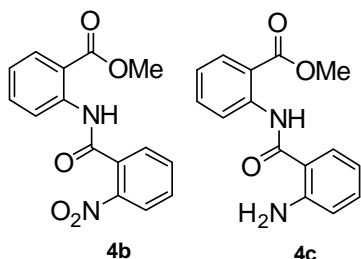

Compound **4b** and **4c** were synthesized as per the reported procedure.<sup>1</sup>

**tert-butyl (S)-2-((2-((2-(methoxycarbonyl)phenyl)carbamoyl)phenyl)carbamoyl)pyrrolidine-1-carboxylate 4d:**

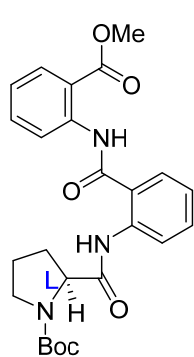

To a solution of Boc-<sup>L</sup>Pro-OH (6g, 27.9 mmol, 1.02 equiv.) and  $\text{Et}_3\text{N}$  (3.807 mL, 1.02 equiv.) in THF (60mL) at 0 °C, ethyl chloroformate (3.028 mL, 1.02 equiv.) was added drop wise and the reaction mixture was stirred for 1 h at 0 °C. A solution of the amine **4c** (7.38 g, 27.3 mmol, 1 equiv.) in THF (40 mL) was added slowly to the mixed anhydride solution, prepared above. The reaction mixture was stirred at 0 °C for an hour, then at room temperature for 2 h, followed by reflux at 70 °C for 6 h. After completion of reaction, THF was removed under reduced pressure

and then the compound was taken into DCM. The combined organic layers were washed sequentially with solutions of  $\text{KHSO}_4$ ,  $\text{NaHCO}_3$  and brine. Organic layer was then dried over  $\text{Na}_2\text{SO}_4$  and was evaporated *in vacuo*. The crude product was purified by column chromatography (eluent: 30% AcOEt/pet. Ether,  $R_f$ : 0.3) to furnish **9a** (10.3 g, 90%) as a fluffy white solid. mp: 71-73 °C;  $[\alpha]^{24.87}_D$ : -119.448° (*c* 1,  $\text{CHCl}_3$ ); IR ( $\text{CHCl}_3$ )  $\nu$  ( $\text{cm}^{-1}$ ): 3448, 2976, 1693, 1655, 1607, 1584, 1524, 1435, 1388, 1318, 1271, 1164, 1097;  $^1\text{H}$  NMR (200 MHz,  $\text{CDCl}_3$ )  $\delta$ : 12.09<sub>rotamer</sub> (s, 0.6H, amide), 12.05<sub>rotamer</sub> (s, 0.4H, amide), 11.82<sub>rotamer</sub> (s, 0.4H, amide), 11.76<sub>rotamer</sub> (s, 0.6H, amide), 8.9-8.71(m, 2H), 8.11-8.07 (dd,  $J = 1.52$  Hz,  $J = 7.96$ Hz, 1H), 7.92-7.85 (m, 1H), 7.88-7.49 (m, 2H), 7.29-7.12 (m, 2H), 4.5-4.27 (m, 1H), 3.96 (s, 3H), 3.85-3.74 (m, 2H), 2.37-2.11 (m, 2H), 2.04- 1.87 (m, 2H), 1.45<sub>rotamer</sub> (s, 3H), 1.33<sub>rotamer</sub> (s, 6H);  $^{13}\text{C}$  NMR (50 MHz,  $\text{CDCl}_3$ )  $\delta$ : 172.2, 171.7, 168.9, 168.8, 167.4, 167.3, 154.8, 154.0, 141.2, 141.0, 139.8, 134.9, 134.3, 132.9, 130.8, 127.0, 123.2, 122.9, 121.1, 120.5, 115.4, 115.2, 80.0, 79.8, 62.5, 61.9, 52.47, 49.9, 47.7, 36.5, 31.4, 30.4, 29.5, 28.3, 28.2, 28.1, 24.5, 24.1, 23.8, 23.6, 23.3; MALDI-TOF/TOF: 490.310 ( $\text{M}+\text{Na}$ )<sup>+</sup>, 506.3015 ( $\text{M}+\text{K}$ )<sup>+</sup>; Elemental analysis calculated for  $\text{C}_{25}\text{H}_{29}\text{N}_3\text{O}_6$ : C, 64.23; H, 6.25; N, 8.99. Found: C, 64.21; H, 6.33; N, 9.02.

#### General Procedures for **1a**, **1d** and **1e**:

##### 2-(2-azidopropan-2-yl)-4H-benzo[d][1,3]oxazin-4-one **1a**:

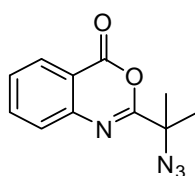

To a solution of **3d** (3 g, 12.096 mmol, 1 equiv) in DCM, EDC.HCl (2.54 g, 13.306 mmol, 1.2 equiv) was added. The solution was allowed to stir for 2h. After the completion, reaction mixture was diluted with DCM (30 mL), the organic layer was combined and was washed with water, followed by  $\text{NaHCO}_3$  solution and brine solution. The organic layer was then dried over  $\text{Na}_2\text{SO}_4$  and was removed *in vacuo*. Colorless liquid was isolated with 94% yield. Characterization was difficult due to unstable nature of the oxazinone. IR ( $\text{CHCl}_3$ )  $\nu$  ( $\text{cm}^{-1}$ ): 3020, 2979, 2401, 2117, 1678, 1606, 1587, 1524, 1450, 1409, 1299, 1165, 1046, 1607, 1584, 1524, 1435, 1388, 1318, 1271, 1164, 1097, 927;  $^1\text{H}$  NMR (200 MHz,  $\text{CDCl}_3$ ): 8.22-8.18 (d,  $J = 1.01$  Hz,  $J = 7.83$  Hz, 1H), 7.88-7.79 (m, 1H), 7.68-7.64 (d,  $J = 7.58$  Hz, 1H), 7.59-7.51 (m, 1H), 1.69 (s, 6H);  $^{13}\text{C}$  NMR (50 MHz,  $\text{CDCl}_3$ )  $\delta$  161.9, 158.8, 145.6, 136.6, 128.9, 128.5, 127.4, 116.8, 62.4, 24.8.

**6,7-difluoro-2-phenyl-4H-benzo[d][1,3]oxazin-4-one 1b:**

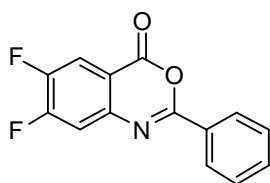

Compound **1b** was synthesized as per the reported procedure.<sup>2</sup>

**2-(2-nitrophenyl)-4H-benzo[d][1,3]oxazin-4-one 1c:**

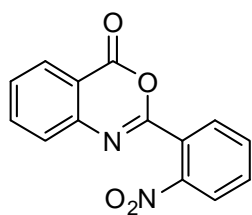

Compound **3c** was synthesized as per the reported procedure.<sup>1</sup>

**(S)-tert-butyl 2-((2-(4-oxo-4H-benzo[d][1,3]oxazin-2-yl)phenyl)carbamoyl)pyrrolidine-1-carboxylate 1d:**

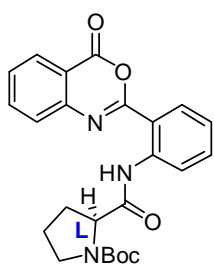

The crude product was purified by column chromatography (eluent: 30% AcOEt/pet. Ether,  $R_f$ : 0.3) to furnish **1d** (4.5 g, 98%) as a fluffy white solid. mp: 95-97°C;  $[\alpha]^{25.58}$ : -18.316° ( $c$  1, CHCl<sub>3</sub>); IR (CHCl<sub>3</sub>)  $\nu$  (cm<sup>-1</sup>): 3448, 2977, 1770, 1694, 1606, 1584, 1520, 1477, 1446, 1388, 1293, 1251, 1163, 1119, 1036, 1009; <sup>1</sup>H NMR (200 MHz, CDCl<sub>3</sub>)  $\delta$ : 12.05<sub>rotamer</sub> (0.8H, amide), 11.79-11.72<sub>rotamer</sub> (0.2H, amide), 8.9-8.68 (m, 1H), 8.23-8.19 (m, 1H), 8.06-8.02 (m, 1H), 7.94-7.85 (m, 1H), 7.58-7.50 (m, 2H), 7.22-7.12 (m, 1H), 4.44-4.23 (m, 1H), 3.76-3.39 (m, 2H), 2.43-2.28 (m, 1H), 2.24-2.05 (m, 1H), 1.96-1.86 (m, 2H), 1.43-1.36<sub>rotamer</sub> (m, 3H), 1.31<sub>rotamer</sub> (s, 6H); <sup>13</sup>C NMR (50 MHz, CDCl<sub>3</sub>)  $\delta$  172.2, 167.2, 158.1, 156.9, 154.9, 145.3, 141.0, 139.8, 137.0, 133.7, 132.8, 130.7, 129.5, 128.7, 128.4, 127.1, 126.8, 123.0, 120.9, 120.6, 120.5, 116.4, 115.7, 95.9, 80.5, 79.9, 62.8, 62.4, 61.5, 52.4, 47.4, 46.6, 31.7, 28.0, 27.2, 24.0; MALDI-TOF: 458.1276 (M+Na<sup>+</sup>); 474.0995 (M+K<sup>+</sup>). Anal. calcd for C<sub>15</sub>H<sub>12</sub>N<sub>2</sub>O<sub>5</sub>: C, 66.19; H, 5.79; N, 9.65. Found: C, 66.39; H, 5.89; N, 9.55.

**6-isobutoxy-2-(5-isobutoxy-2-nitrophenyl)-4H-benzo[d][1,3]oxazin-4-one **1e**:**

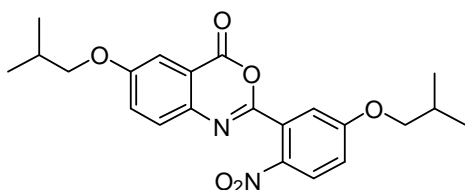

The crude product was purified by column chromatography (eluent: 15% AcOEt/pet. Ether,  $R_f$ : 0.3) to furnish **1e** (98%) as a waxy solid. IR ( $\text{CHCl}_3$ )  $\nu$  ( $\text{cm}^{-1}$ ): 3438, 2980, 1772, 1686, 1580, 1483, 1447, 1369, 1299, 1158;  $^1\text{H}$  NMR (200 MHz,  $\text{CDCl}_3$ )  $\delta$ : 7.81-7.76 (d,  $J = 8.97$  Hz, 1H), 7.32-7.31 (m, 1H), 7.14-7.08 (dd,  $J = 2.78$  Hz,  $J = 9.09$  Hz, 1H), 7.00-6.97 (dd,  $J = 2.78$  Hz,  $J = 8.84$  Hz, 1H), 3.58-3.53 (dd,  $J = 3.03$  Hz,  $J = 6.57$  Hz, 4H), 1.91-1.77 (m, 2H), 0.76-0.73 (dd,  $J = 3.16$  Hz,  $J = 6.69$  Hz, 6H);  $^{13}\text{C}$  NMR (50 MHz,  $\text{CDCl}_3$ )  $\delta$  162.9, 159.6, 159.0, 153.7, 140.7, 140.1, 129.1, 128.7, 127.1, 126.1, 117.8, 116.5, 116.4, 105.6, 75.4, 75.1, 29.6, 28.1, 19.1, 19.0; LC-MS: 435.06 ( $\text{M}+\text{Na}^+$ ); 467.08 ( $\text{M}+\text{K}^+$ );. Anal. calcd for  $\text{C}_{22}\text{H}_{24}\text{N}_2\text{O}_6$ : C, 64.07; H, 5.87; N, 6.79; Found: C, 64.21; H, 5.89; N, 6.80.

**Table 1:** Optimisation of coupling of 2-(2-azidopropan-2-yl)-2H-benzo[d][1,3]oxazin-4-one **1a** with H-<sup>L</sup>Pro-OBn.

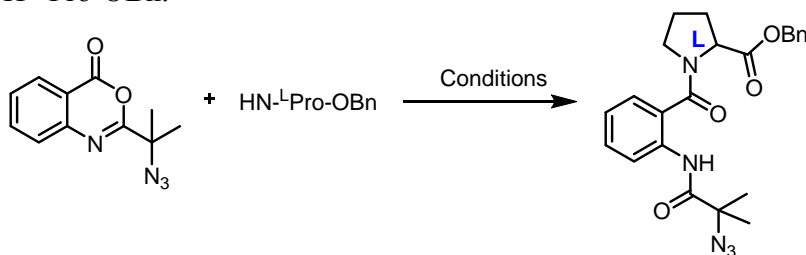

| S. No. | Condition                                      | Inference                         |
|--------|------------------------------------------------|-----------------------------------|
| 1      | $\text{Ti}(\text{O}^i\text{Pr})_4$ , DCM, heat | No coupling, oxazinone decomposed |
| 2      | $\text{Sc}(\text{OTf})_3$ , DCM, 80 °C         | Coupling trace                    |
| 3      | Dry Toluene, heat                              | Coupling trace                    |
| 4      | Acetonitrile, MW, 280W, 20 min                 | No coupling observed              |
| 5      | DBU, 4Å MS, DMF                                | Coupling trace                    |
| 6      | Dry Toluene, MW, MW, 280W, 20 min              | Coupling trace                    |
| 7      | 10% Schreiner's (thio)urea, toluene, 24h       | 65% product formation             |



**Table 2:** Comparison of coupling of oxazinones **1a-e** with H-L-Pro-OBn in DMSO

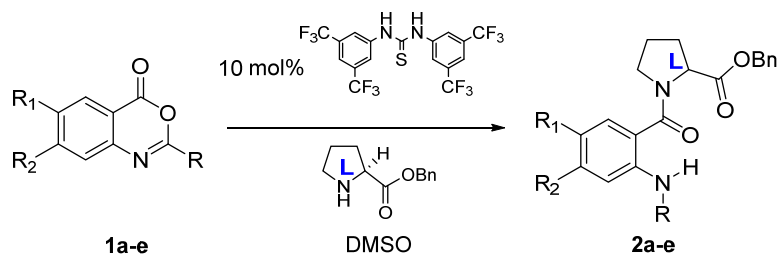

|           | -R <sub>1</sub> | -R <sub>2</sub> | -R | Time (h) | Conversion (%) | Yield (%) <sup>a</sup> |
|-----------|-----------------|-----------------|----|----------|----------------|------------------------|
| <b>2a</b> |                 | H               | H  | 24       | 100            | 81                     |
| <b>2b</b> |                 | F               | F  | 36       | 92             | 70 <sup>b</sup>        |
| <b>2c</b> |                 | H               | H  | 9        | 100            | 97                     |
| <b>2d</b> |                 | H               | H  | 24       | 100            | 75                     |
| <b>2e</b> |                 | OiBu            | H  | 48       | 52             | 91 <sup>c</sup>        |

<sup>a</sup>Unless specified, reaction was carried out at 25 °C with oxazinone (1 equiv.) and H-L-Pro-OBn (1.5 equiv.). <sup>b</sup>Yield calculated after 8% oxazinone recovery. <sup>c</sup>Yield calculated after 48% oxazinone recovery.

**General Procedures for 2a-e:**

To a solution of oxazinone (1 equiv.) and amine (1.5 equiv.) taken in DMSO (1 mL), 1,3-bis(3,5-bis(trifluoromethyl)phenyl)thiourea (10 mol%) was added. Completion of the reaction was constantly monitored by TLC. After the complete/maximum conversion of the oxazinone moiety, water (2 mL) was added to the reaction mixture. Compound was then extracted into DCM (3 x 5 mL) from the aqueous layer. Organic layer was pooled together and was washed with KHSO<sub>4</sub> solution followed by brine solution. The organic layer was then dried over Na<sub>2</sub>SO<sub>4</sub> and was evaporated *in vacuo* to afford coupled product. Compounds were purified by silica gel column chromatography.

**benzyl 1-(2-(2-azido-2-methylpropanamido)benzoyl)pyrrolidine-2-carboxylate 2a:**

The crude product was purified by column chromatography (eluent: 25% AcOEt/pet. Ether,  $R_f$ : 0.4) to furnish **2a** (81%) as a pale yellow glassy solid.  $[\alpha]^{24.7}_D$ :  $-67.56^\circ$  ( $c$  0.5,

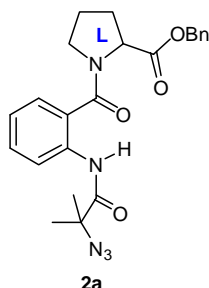

$\text{CHCl}_3$ ); IR ( $\text{CHCl}_3$ )  $\nu$  ( $\text{cm}^{-1}$ ): 3307, 2923, 2852, 2115, 1744, 1692, 1629, 1597, 1520, 1454, 1412, 1305, 1269, 1166;  $^1\text{H}$  NMR (200 MHz,  $\text{CDCl}_3$ )  $\delta$ : 10.12<sub>rotamer</sub> (0.8H, amide), 9.59<sub>rotamer</sub> (0.2H, amide), 8.39-8.35 (d,  $J$  = 8.34 Hz, 0.8H), 8.39-8.35 (d,  $J$  = 8.08 Hz, 0.2H), 7.50-7.38 (m, 6H), 7.19-6.56 (m, 2H), 5.26 (s, 2H), 5.04-4.72 (m, 1H), 3.94-3.78 (m, 0.4H), 3.73-3.54 (m, 1.6H), 2.24-2.05 (m, 1H), 2.38-2.27 (m, 1H), 2.14-1.85 (m, 3H), 1.63 (s, 6H);  $^{13}\text{C}$  NMR (50

MHz,  $\text{CDCl}_3$ )  $\delta$ : 171.5, 171.2, 169.3, 168.5, 136.3, 135.6, 135.0, 131.1, 130.6, 128.5, 128.2, 128, 127.4, 126.4, 124.7, 123.3, 122.6, 121.9, 66.8, 64.5, 61.6, 59.2, 50.2, 46.6, 31.3, 29.1, 25.1, 24.5, 24.4; MALDI-TOF/TOF: 458.1152 ( $\text{M}+\text{Na}^+$ ); 474.0970 ( $\text{M}+\text{K}^+$ ); Anal. calcd for  $\text{C}_{23}\text{H}_{25}\text{N}_5\text{O}_4$ : C, 63.44; H, 5.79; N, 16.08. Found: C, 63.66; H, 5.98; N, 16.10.

#### benzyl 1-(2-benzamido-4,5-difluorobenzoyl)pyrrolidine-2-carboxylate **2b**:

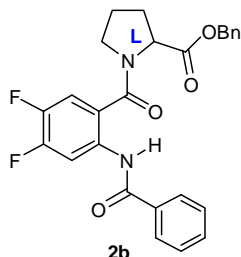

The crude product was purified by column chromatography (eluent: 15% AcOEt/pet. Ether,  $R_f$ : 0.4) to furnish **2b** (70% after 8% recovery of starting material) as a pale yellow solid. mp: 78-80  $^\circ\text{C}$ ;  $[\alpha]^{25.84}_D$ :  $-39.14^\circ$  ( $c$  1,  $\text{CHCl}_3$ ); IR ( $\text{CHCl}_3$ )  $\nu$  ( $\text{cm}^{-1}$ ): 3347, 2924, 1744, 1681, 1615, 1533, 1440, 1409, 1279, 1167;  $^1\text{H}$  NMR (200

MHz,  $\text{CDCl}_3$ )  $\delta$ : 10.4 (1H, amide), 8.65-8.54 (dd,  $J$  = 7.58 Hz,  $J$  = 12.88 Hz, 1H), 8.11-7.92 (m, 2H), 7.61-7.31 (m, 9H), 5.27-5.12 (m, 2H), 4.78-4.72 (m, 1H), 3.70-3.61 (m, 2H), 2.41-2.27 (m, 1H), 2.09-1.91 (m, 3H);  $^{13}\text{C}$  NMR (50 MHz,  $\text{CDCl}_3$ )  $\delta$ : 171.4, 167.4, 165.4, 135.3, 134.8, 133.8, 133.4, 132.1, 130.0, 128.6, 128.4, 128.0, 127.4, 119.5, 116.3, 115.9, 111.7, 111.3, 67.0, 598.5, 50.5, 29.6, 29.0, 25.2; MALDI-TOF/TOF: 487.2480 ( $\text{M}+\text{Na}^+$ ); 503.1575 ( $\text{M}+\text{K}^+$ ); Anal. calcd for  $\text{C}_{26}\text{H}_{22}\text{F}_2\text{N}_2\text{O}_4$ : C, 67.23; H, 4.77; F, 8.18; N, 6.03. Found: C, 67.45; H, 4.84; F, 8.40; N, 6.0.

#### benzyl 1-(2-(2-nitrobenzamido)benzoyl)pyrrolidine-2-carboxylate **2c**:

The crude product was purified by column chromatography (eluent: 40% AcOEt/pet. Ether,  $R_f$ : 0.3) to furnish **2c** (90%) as a waxy solid.  $[\alpha]^{25.86}_D$ :  $-19.0687^\circ$  ( $c$  1,  $\text{CHCl}_3$ ); IR ( $\text{CHCl}_3$ )  $\nu$  ( $\text{cm}^{-1}$ ): 2924, 2853, 1739, 1688, 1625, 1531, 1456, 1415, 1348, 1310, 1186;  $^1\text{H}$

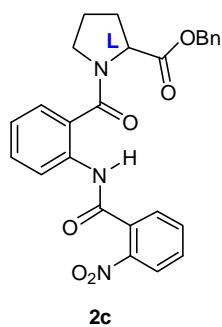

NMR (500 MHz,  $\text{CDCl}_3$ )  $\delta$ : 9.43<sub>rotamer</sub> (s, 0.9H, amide), 9.10<sub>rotamer</sub> (s, 0.1H, amide), 8.50-8.49<sub>rotamer</sub> (d,  $J$  = 8.24 Hz, 0.9H), 8.24-8.22<sub>rotamer</sub> (m, 0.1H), 8.08-8.06 (d,  $J$  = 8.24 Hz, 0.9H), 8.01-7.99 (m, 0.1H), 7.73-7.65 (m, 2H), 7.58-7.55 (m, 1H), 7.51-7.48 (m, 1H), 7.41-7.14 (m, 7H), 5.07-4.98 (m, 2H), 4.71-4.69<sub>rotamer</sub> (m, 0.9H), 4.51-4.49<sub>rotamer</sub> (m, 0.1H), 3.64-3.6 (m, 1H), 3.51-3.47 (m, 1H), 2.37-2.27 (m, 1H), 2.01-1.86 (m, 3H);  $^{13}\text{C}$  NMR (125 MHz,  $\text{CDCl}_3$ )  $\delta$ : 172.1, 168.5, 164.9, 146.4, 135.5, 135.3, 133.7, 133.0, 130.9, 130.4, 129.1, 128.6, 128.4, 128.0, 126.6, 125.9, 124.3, 124.1, 122.3, 67.0, 58.9, 49.7, 29.2, 25.0; MALDI-TOF/TOF: 496.4159 ( $\text{M}+\text{Na}^+$ ); 512.3204 ( $\text{M}+\text{K}^+$ ); Anal. calcd for  $\text{C}_{26}\text{H}_{23}\text{N}_3\text{O}_6$ : C, 65.95; H, 4.90; N, 8.87;. Found: C, 65.74; H, 4.69; N, 8.95.

#### tert-butyl

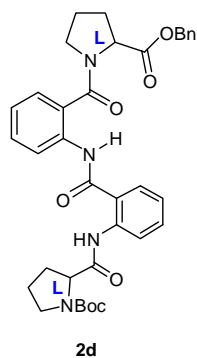

#### 2-((2-((2-((benzyloxy)carbonyl)pyrrolidine-1-carbonyl)phenyl)carbamoyl)phenyl)carbamoyl)pyrrolidine-1-carboxylate **2d**:

The crude product was purified by column chromatography (eluent: 50% AcOEt/pet. Ether,  $R_f$ : 0.3) to furnish **2d** (75%) as a waxy solid.  $[\alpha]^{25.6}_D$ :  $-48.768^\circ$  ( $c$  0.5,  $\text{CHCl}_3$ ); IR ( $\text{CHCl}_3$ )  $\nu$  ( $\text{cm}^{-1}$ ): 3276, 2925, 2853, 1742, 1694, 1626, 1585, 1520, 1449, 1411, 1298, 1216, 1165, 1121, 1089, 917;  $^1\text{H}$  NMR (200 MHz,  $\text{CDCl}_3$ )  $\delta$ : 11.68<sub>rotamer</sub> (0.6H, amide), 11.63<sub>rotamer</sub> (0.4H, amide), 10.37<sub>rotamer</sub> (0.6H, amide), 10.21<sub>rotamer</sub> (0.4H, amide), 8.65-8.61 (d,  $J$  = 8.34 Hz, 1H), 8.50-8.46<sub>rotamer</sub> (d,  $J$  = 7.83 Hz, 0.9H), 8.37-8.33<sub>rotamer</sub> (d,  $J$  = 8.08 Hz, 0.1H), 7.70-7.66 (m, 1H), 7.43-7.39 (m, 3H), 7.13-6.98 (m, 2H), 5.12 (s, 2H), 4.41-4.35 (m, 1H), 4.69-4.65<sub>rotamer</sub> (m, 0.4H), 4.25-4.18<sub>rotamer</sub> (m, 0.6H), 3.77-3.36 (m, 2H), 2.33-2.06 (m, 4H), 1.95-1.78 (m, 4H), 1.39<sub>rotamer</sub> (s, 3H), 1.27<sub>rotamer</sub> (s, 6H);  $^{13}\text{C}$  NMR (50 MHz,  $\text{CDCl}_3$ )  $\delta$ : 172.1, 171.6, 171.5, 169, 166.9, 154.8, 154.0, 139.7, 136.8, 135.3, 132.8, 131.5, 131.0, 128.4, 128.2, 127.8, 127.4, 127.3, 124.3, 123.1, 122.9, 121.9, 120.8, 120.2, 80.0, 79.8, 77.2, 66.8, 62.4, 61.8, 52.3, 50.4, 46.9, 46.6, 38.4, 36.5, 31.7, 31.3, 30.4, 29.5, 29.0, 28.1, 25.1, 24.5, 24.1, 23.6; MALDI-TOF/TOF:

663.4386 (M+Na<sup>+</sup>); 679.4749 (M+K<sup>+</sup>); Anal. calcd for C<sub>36</sub>H<sub>40</sub>N<sub>4</sub>O<sub>7</sub>: C, 67.48; H, 6.29; N, 8.74;. Found: C, 67.68; H, 6.16; N, 8.89.

**benzyl 1-(5-isobutoxy-2-(5-isobutoxy-2-nitrobenzamido)benzoyl)pyrrolidine-2-carboxylate 2e:**

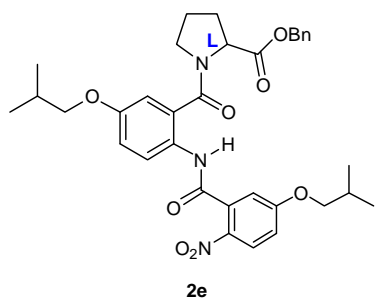

The crude product was purified by column chromatography (eluent: 35% AcOEt/pet. Ether, R<sub>f</sub>: 0.3) to furnish **2e** (91% after 48% recovery of starting material) as a waxy solid. Waxy solid. [α]<sup>25.6</sup><sub>D</sub>: -48.768° (*c* 1, CHCl<sub>3</sub>); IR (CHCl<sub>3</sub>) ν (cm<sup>-1</sup>): 3327, 3020, 2964, 2930, 2401, 1735, 1680, 1630, 1590, 1471, 1446, 1397, 1341, 1030; <sup>1</sup>H NMR

(200 MHz, CDCl<sub>3</sub>) δ: 8.94<sub>rotamer</sub> (0.9H, amide), 8.53<sub>rotamer</sub> (0.1H, amide), 8.34-8.30<sub>rotamer</sub> (d, J = 9 Hz, 0.9H), 8.12-8.07 (d, J = 9.22 Hz, 1H), 8.02-7.97<sub>rotamer</sub> (d, J = 9 Hz, 0.1H), 7.37-7.23 (m, 5H), 7.07-6.87 (m, 4H), 5.11-4.93 (2H), 4.71-4.64<sub>rotamer</sub> (m, 0.9H), 4.54-4.51<sub>rotamer</sub> (m, 0.1H), 3.83-3.80 (d, J = 6.57 Hz, 2H), 3.73-3.70 (d, J = 6.57 Hz, 2H), 3.65-3.42 (m, 2 H), 2.38-1.91 (m, 7H), 1.04-0.98 (dd, J = 2.65 Hz, J = 6.69 Hz, 4H); <sup>13</sup>C NMR (200 MHz, CDCl<sub>3</sub>) δ: 172.1, 168.1, 165.0, 163.6, 155.7, 138.4, 135.7, 135.3, 128.5, 128.3, 128.0, 127.94, 127.9, 126.9, 124.1, 116.4, 115.4, 114.3, 112.4, 75.3, 74.8, 67.0, 58.8, 49.6, 29.6, 29.2, 28.2, 28.0, 24.9, 19.2, 19.0; MALDI-TOF/TOF: 640.8233 (M+Na<sup>+</sup>); 656.9022 (M+Na<sup>+</sup>); Anal. calcd for C<sub>34</sub>H<sub>39</sub>N<sub>3</sub>O<sub>8</sub>: C, 66.11; H, 6.36; N, 6.80;. Found: C, 66.34; H, 6.50; N, 6.85.

**Table 3.** Comparison of coupling of different amines with oxazinone **1c**

10 mol% amines  
DMSO

**1c** → **2f-j**

|           | -R' | Time (h) | Conversion (%) | Yield (%) <sup>a</sup> |
|-----------|-----|----------|----------------|------------------------|
| <b>2f</b> |     | 0.5      | 100            | 94                     |
| <b>2g</b> |     | 0.12     | 100            | 94                     |
| <b>2h</b> |     | 48       | 60             | 82 <sup>b</sup>        |
| <b>2i</b> |     | 36       | 100            | 89                     |
| <b>2j</b> |     | 0.05     | 100            | 97                     |

<sup>a</sup>Unless specified, reaction was carried out at 25 °C with oxazinone (1 equiv.) and amine (1.5 equiv.). <sup>b</sup>Yield calculated after 40% oxazinone recovery.

**2-nitro-N-(2-(piperidine-1-carbonyl)phenyl)benzamide 2f:**

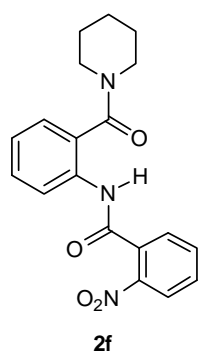

The crude product was purified by column chromatography (eluent: 50% AcOEt/pet. Ether,  $R_f$ : 0.4) to furnish **2f** (94%) as a white solid. mp: 136-138°C; IR (CHCl<sub>3</sub>)  $\nu$  (cm<sup>-1</sup>): 3230, 3004, 2938, 2857, 1678, 1615, 1600, 1531, 1436, 1348, 1310, 1287, 1257, 1125, 1003, 856; <sup>1</sup>H NMR (200 MHz, CDCl<sub>3</sub>)  $\delta$ : 9.3 (1H, amide), 8.27-8.23 (d,  $J$ = 8.21 Hz, 1H), 8.11-8.07 (d,  $J$ = 8.21 Hz, 1H), 7.76-7.57 (m, 3H), 7.52-7.43 (dt,  $J$ = 1.77 Hz,  $J$ = 8.46 Hz, 1H), 7.28-7.14 (m, 2H), 3.58 (bs, 4H), 1.67 (bs, 6H); <sup>13</sup>C NMR (50 MHz, CDCl<sub>3</sub>)  $\delta$ : 168.7, 164.5, 146.4, 135.9, 133.9, 132.8, 130.7, 130.6, 128.7, 127.2, 125.9, 124.7, 124.2, 124.0, 64.7, 43.6, 43.3, 29.7, 26.4, 25.6, 24.4;

MALDI-TOF/TOF: 376.1107 ( $M+Na^+$ ); 392.0699 ( $M+K^+$ ); Anal. calcd for  $C_{19}H_{19}N_3O_4$ : C, 64.58; H, 5.42; N, 11.89;. Found: C, 64.69; H, 5.23; N, 11.87.

**(S)-2-nitro-N-(2-((1-phenylethyl)carbamoyl)phenyl)benzamide 2g:**

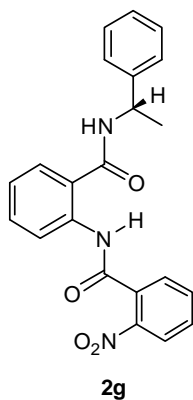

The crude product was purified by column chromatography (eluent: 40% AcOEt/pet. Ether,  $R_f$ : 0.3) to furnish **2g** (94%) as a white solid.  $[\alpha]_D^{25.72}$ :  $-0.612^\circ$  ( $c$  1,  $CHCl_3$ ); IR ( $CHCl_3$ )  $\nu$  ( $cm^{-1}$ ): 3251, 2924, 2853, 1681, 1600, 1531, 1437, 1348, 1287, 856;  $^1H$  NMR (200 MHz,  $CDCl_3$ )  $\delta$ : 11.61 (1H, amide), 8.65-8.61 (d,  $J$ = 8.21 Hz, 1H), 8.06-8.02 (m, 1H), 7.73-7.60 (m, 3H), 7.59-7.46 (m, 2H), 7.38-7.28 (m, 5H), 7.18-7.10 (dt,  $J$  = 0.88 Hz,  $J$ = 7.58 Hz, 1H), 6.68 (bs, 1H), 5.29-5.15 (pentet,  $J$  = 7.07 Hz, 1H), 1.61-1.57 (d,  $J$  = 6.95 Hz, 3H);  $^{13}C$  NMR (50 MHz,  $CDCl_3$ )  $\delta$ : 168.0, 164.4, 146.9, 142.5, 139.0, 133.7, 132.8, 132.7, 130.8, 128.8, 128.4, 127.6, 126.5, 126.0, 124.7, 123.7, 122.0, 120.8, 49.4, 29.7, 21.6; MALDI-TOF/TOF: 412.1174 ( $M+Na^+$ ); 428.0916 ( $M+K^+$ ); Anal. calcd for  $C_{22}H_{19}N_3O_4$ : C, 67.86; H, 4.92; N, 10.79. Found: C, 67.78; H, 4.69; N, 10.89.

**methyl 2-methyl-2-(2-(2-nitrobenzamido)benzamido)propanoate 2h:**

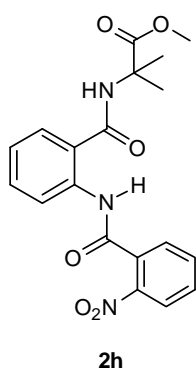

The crude product was purified by column chromatography (eluent: 40% AcOEt/pet. Ether,  $R_f$ : 0.4) to furnish **2h** (82% after 40% recovery of the starting material) as a white solid. mp: 125-126°C; IR ( $CHCl_3$ )  $\nu$  ( $cm^{-1}$ ): 3325, 2925, 2854, 1740, 1680, 1645, 1601, 1532, 1447, 1348, 1306, 1193, 1153, 904;  $^1H$  NMR (200 MHz,  $CDCl_3$ )  $\delta$ : 11.39 (1H, amide), 8.64-8.60 (d,  $J$ = 8.08 Hz, 1H), 8.07-8.03 (d,  $J$ = 8.08 Hz, 1H), 7.75-7.49 (m, 5H), 7.18-7.10 (t,  $J$ = 7.71 Hz, 1H), 6.99 (t, 1H), 3.71 (s, 3H), 1.61 (s, 6H);  $^{13}C$  NMR (50 MHz,  $CDCl_3$ )  $\delta$ : 174.7, 168.4, 164.4, 146.8, 138.9, 133.7, 132.9, 132.7, 130.8, 128.4, 16.8, 124.6, 123.6, 122.0, 120.9, 57.0, 52.7, 24.6; MALDI-TOF/TOF: 408.4238 ( $M+Na^+$ ); 424.3958 ( $M+K^+$ ); Anal. calcd for  $C_{19}H_{19}N_3O_6$ : C, 59.22; H, 4.97; N, 10.90. Found: C, 59.38; H, 4.69; N, 10.81.

**(R)-methyl 3-methyl-2-(2-(2-nitrobenzamido)benzamido)butanoate 2i:**

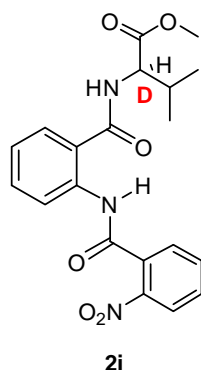

The crude product was purified by column chromatography (eluent: 40% AcOEt/pet. Ether,  $R_f$ : 0.4) to furnish **2i** (89%) as a pale yellow solid. mp: 145-146°C;  $[\alpha]^{26.18}_D$ : -7.336° ( $c$  1, CHCl<sub>3</sub>); IR (CHCl<sub>3</sub>)  $\nu$  (cm<sup>-1</sup>): 3332, 2925, 2853, 1740, 1687, 1646, 1588, 1532, 1447, 1349, 1311, 1210; <sup>1</sup>H NMR (200 MHz, CDCl<sub>3</sub>)  $\delta$ : 11.46 (1H, amide), 8.72-8.68 (d,  $J$ = 8.21 Hz, 1H), 8.07-8.03 (d,  $J$ = 7.83 Hz, 1H), 7.76-7.53 (m, 5H), 7.23-7.15 (t,  $J$ = 7.71 Hz, 1H), 6.87-6.82 (d,  $J$ = 8.34 Hz, 1H), 4.68-4.62 (dd,  $J$ = 5.05 Hz,  $J$ = 8.46 Hz, 1H), 3.77 (s, 3H), 2.34-2.18 (m, 1H), 1.01-0.97 (dd,  $J$ = 1.14 Hz,  $J$ = 6.82 Hz, 6H); <sup>13</sup>C NMR (50 MHz, CDCl<sub>3</sub>)  $\delta$ : 172.0, 168.6, 164.3, 146.9, 139.1, 133.7, 133.1, 132.9, 130.7, 128.4, 126.7, 124.6, 123.7, 121.9, 120.2, 57.4, 52.4, 31.4, 18.9, 18.0; MALDI-TOF/TOF: 400.3518 (M+H<sup>+</sup>); 422.3262 (M+Na<sup>+</sup>); 438.2873 (M+K<sup>+</sup>); Anal. calcd for C<sub>20</sub>H<sub>21</sub>N<sub>3</sub>O<sub>6</sub>: C, 60.14; H, 5.30; N, 10.52. Found: C, 60.01; H, 5.39; N, 10.85.

#### 2-nitro-N-(2-(propylcarbamoyl)phenyl)benzamide **2j**:

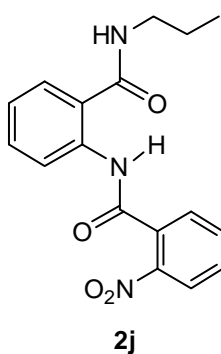

The crude product was purified by column chromatography (eluent: 35% AcOEt/pet. Ether,  $R_f$ : 0.3) to furnish **2j** (97%) as a white solid. mp: 167-169°C; IR (CHCl<sub>3</sub>)  $\nu$  (cm<sup>-1</sup>): 3449, 2925, 1641, 1599, 1525, 1448, 1347; <sup>1</sup>H NMR (200 MHz, CDCl<sub>3</sub>)  $\delta$ : 11.72 (1H, amide), 8.70-8.65 (d,  $J$ = 8.21 Hz, 1H), 8.07-8.03 (d,  $J$ = 7.96 Hz, 1H), 7.73-7.49 (m, 5H), 7.18-7.10 (t,  $J$ = 7.83 Hz, 1H), 6.47 (s, 1H), 3.4-3.29 (m, 7.33 Hz, 3H); <sup>13</sup>C NMR (50 MHz, CDCl<sub>3</sub>)  $\delta$ : 168.8, 164.3, 139.1, 133.7, 133.0, 132.7, 130.7, 128.4, 126.4, 124.7, 123.6, 121.9, 120.8, 63.6, 63.1, 41.7, 29.7, 22.6, 11.4; MALDI-TOF: 350.2100 (M+Na<sup>+</sup>); 366.2022 (M+K<sup>+</sup>); Anal. calcd for C<sub>17</sub>H<sub>17</sub>N<sub>3</sub>O<sub>4</sub>: C, 62.38; H, 5.23; N, 12.84. Found: C, 62.60; H, 5.21; N, 12.88.

#### References:

- 1] Y. Hamuro, S. J. Geib and A. D. Hamilton, *J. Am. Chem. Soc.*, 1997, **119**, 10587-10593.
- 2] A. A. Laeva, E. V. Nosova, G. N. Lipunova, A. V. Golovchenko, N. Yu. Adonin, V. N. Parmon, and V. N. Charushin. *Russ. J. Org. Chem.*, 2009, **45**, 913-920.

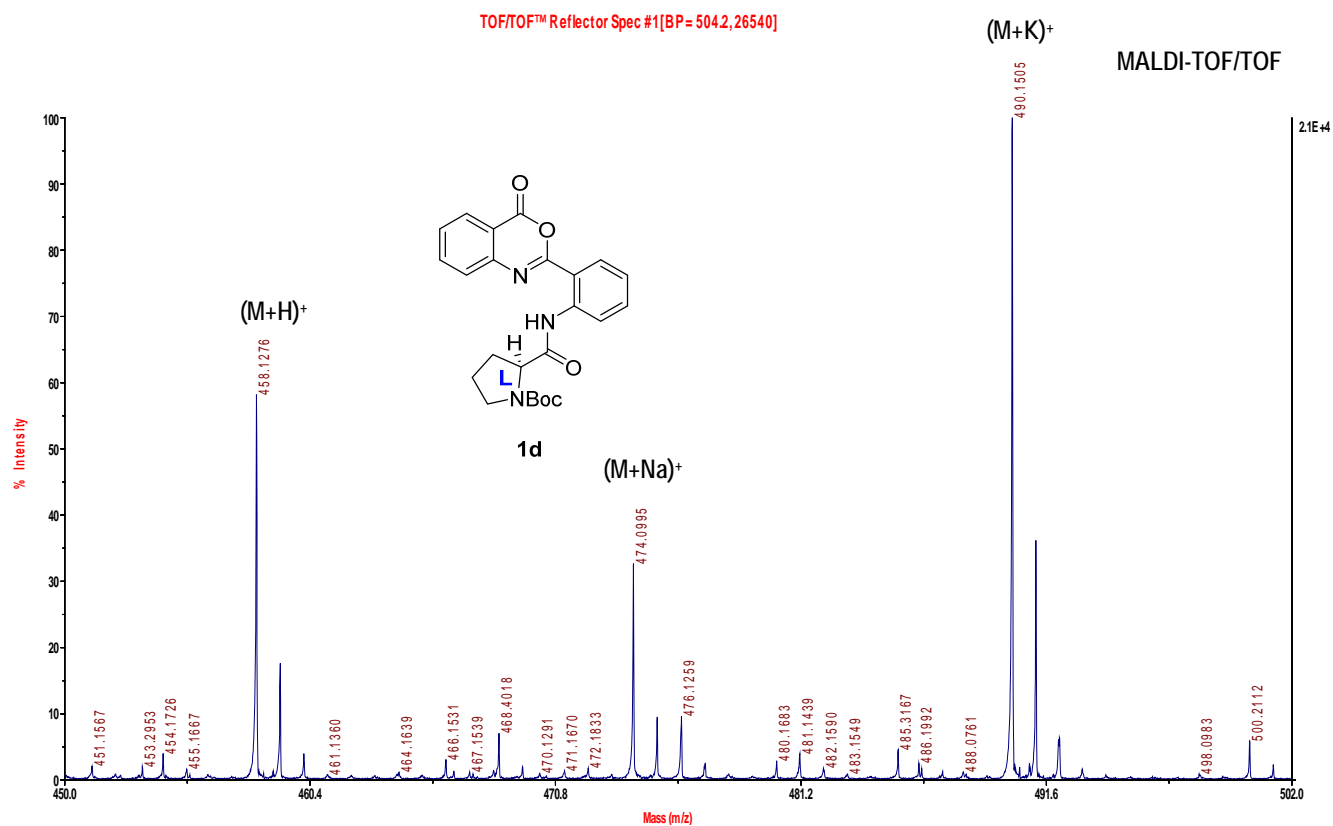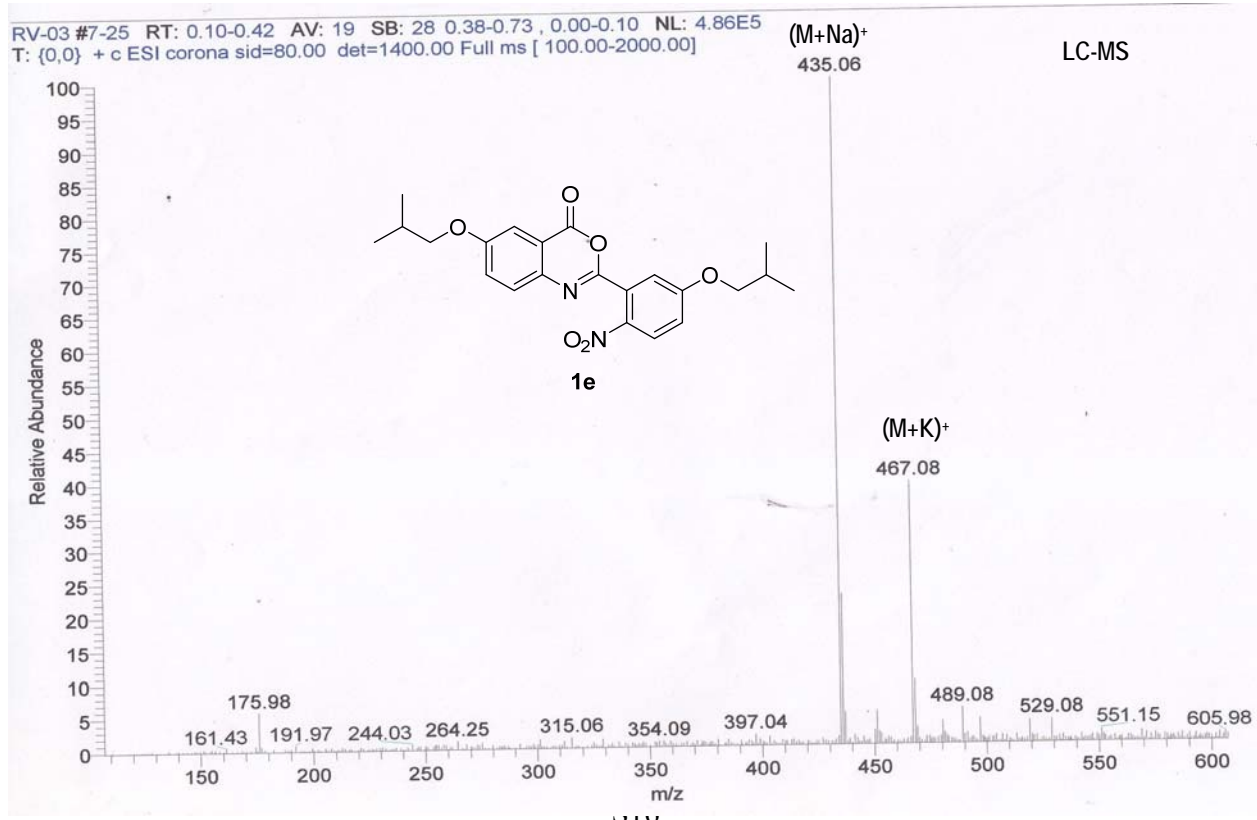



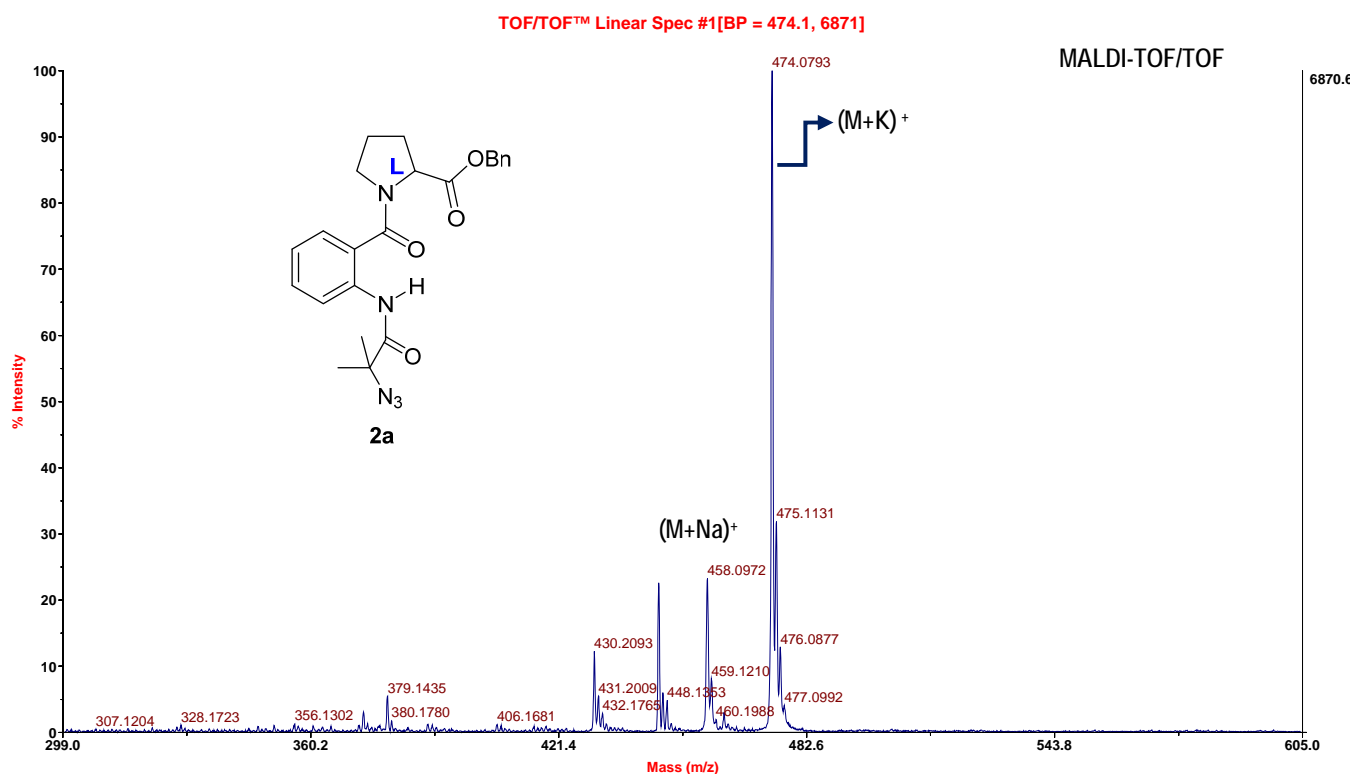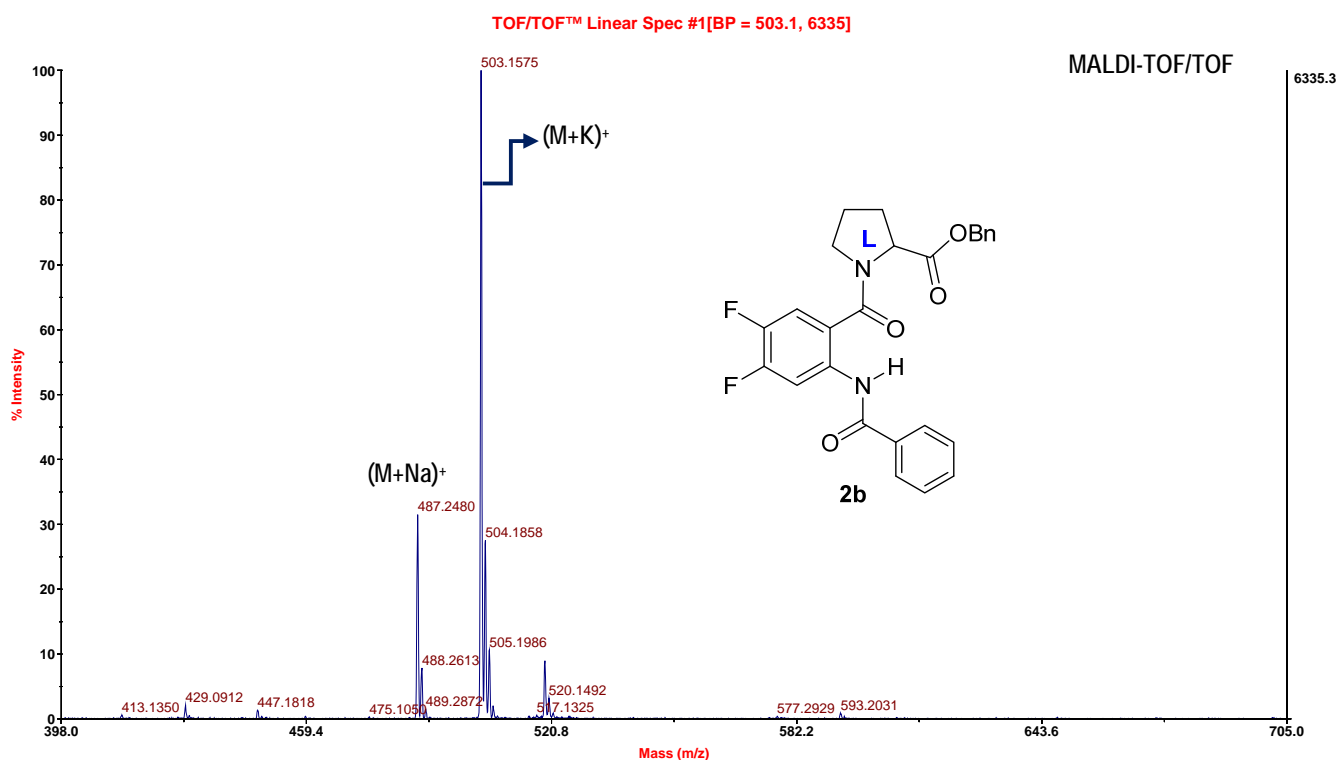

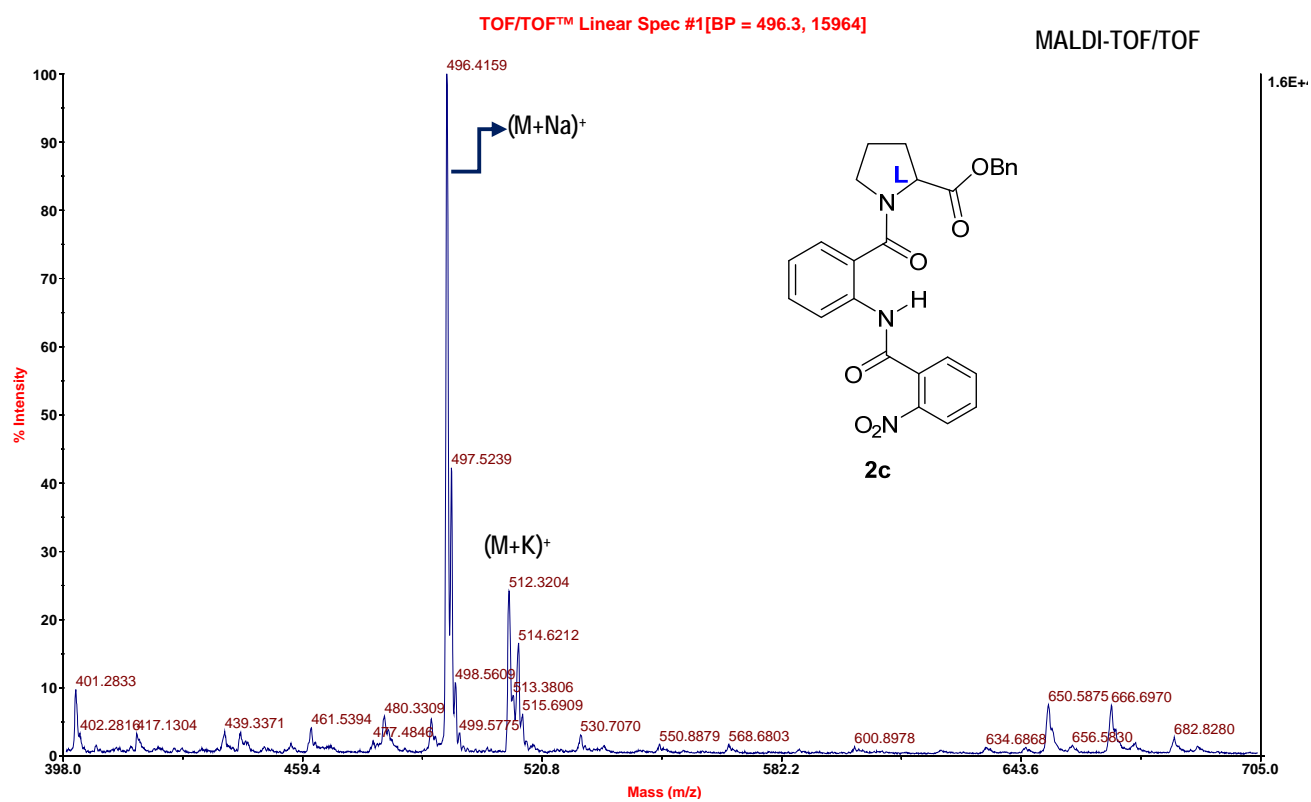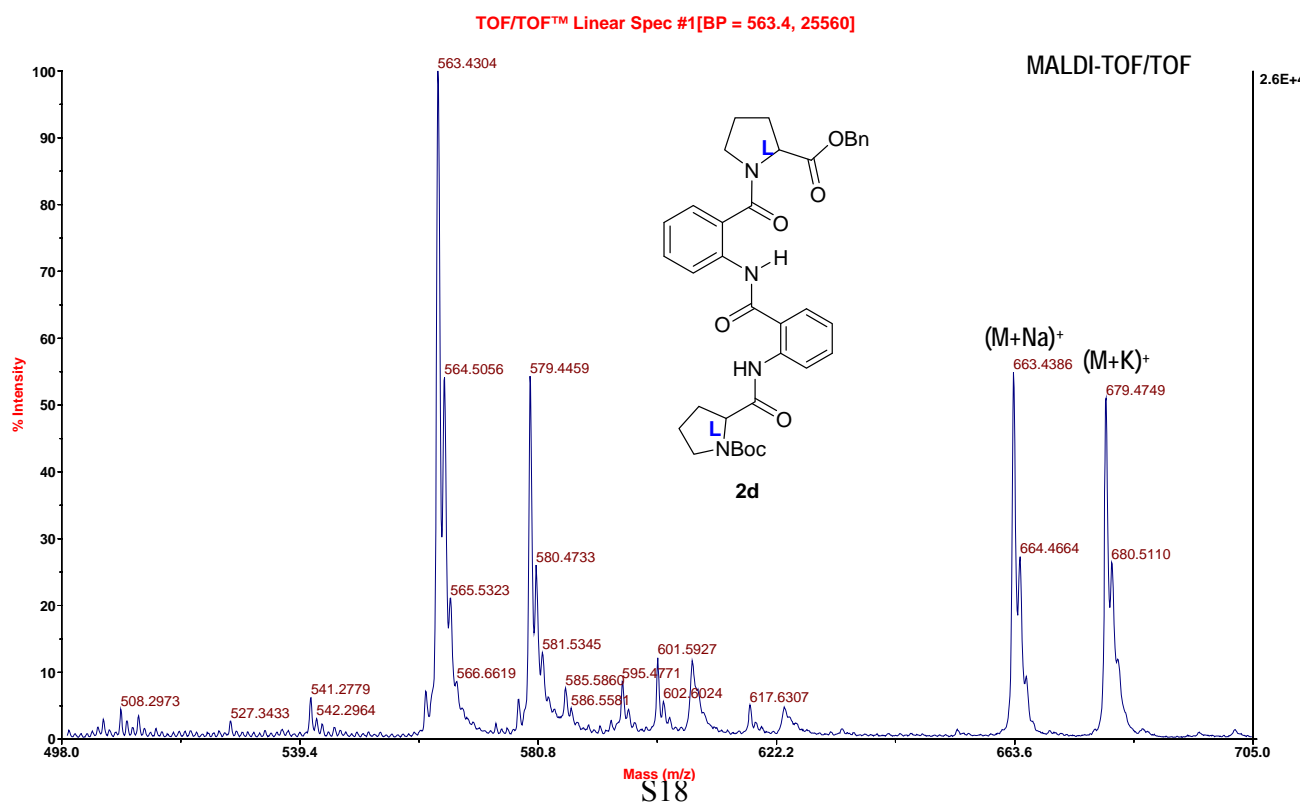

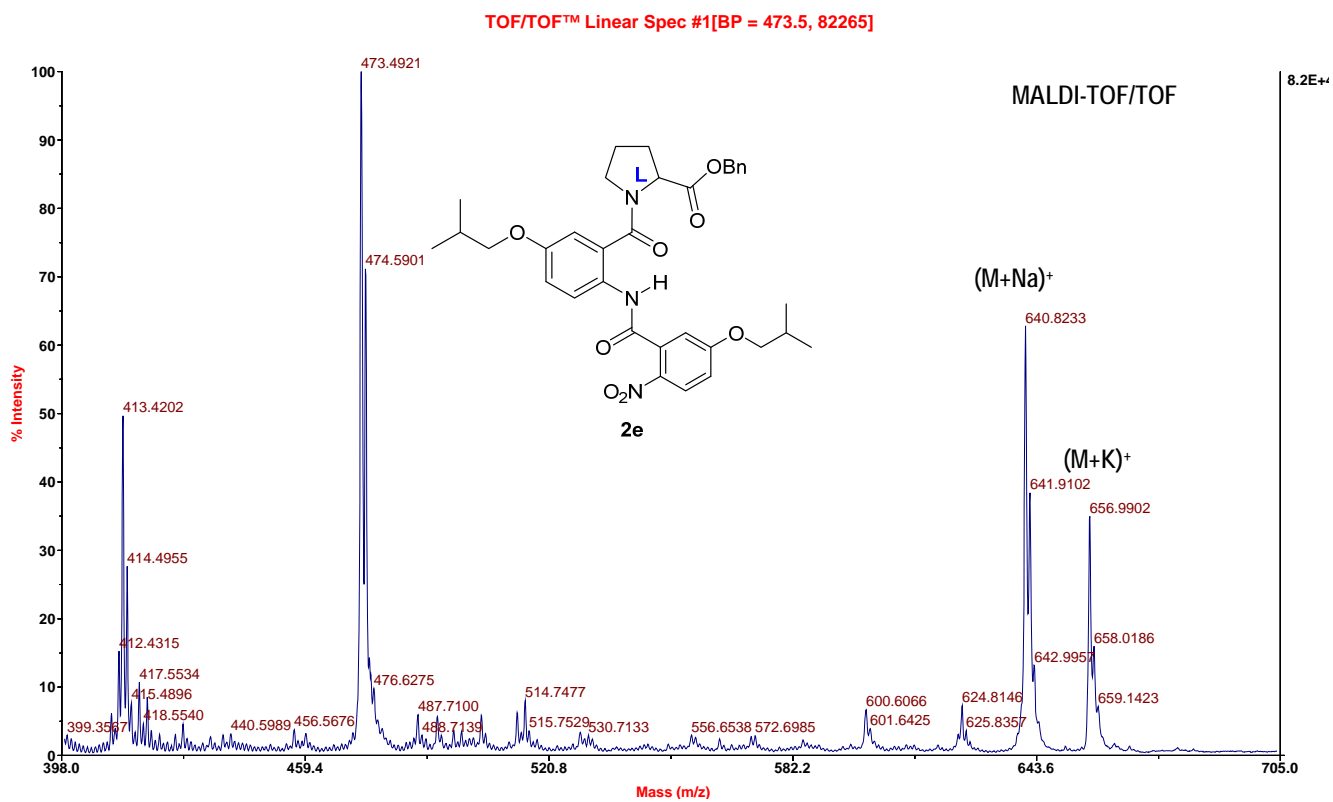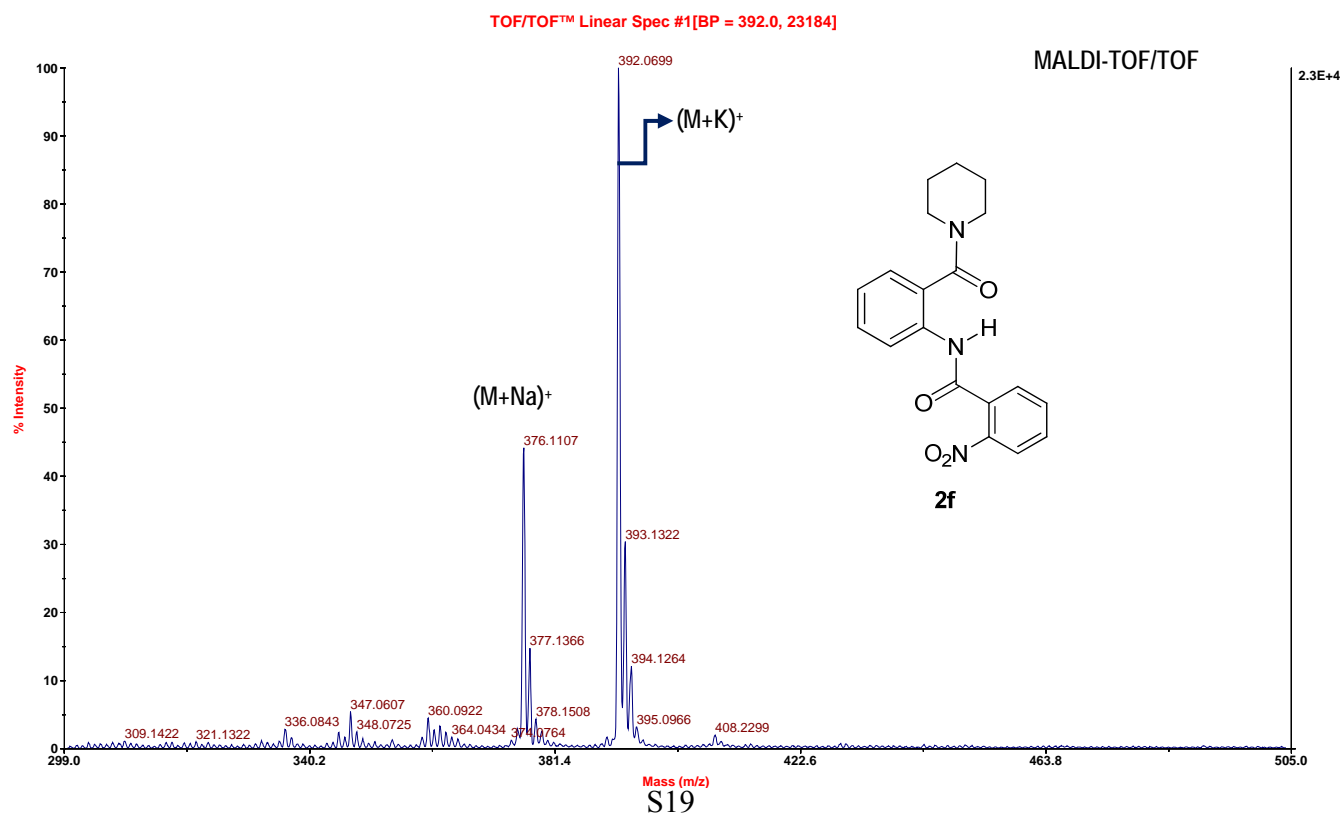

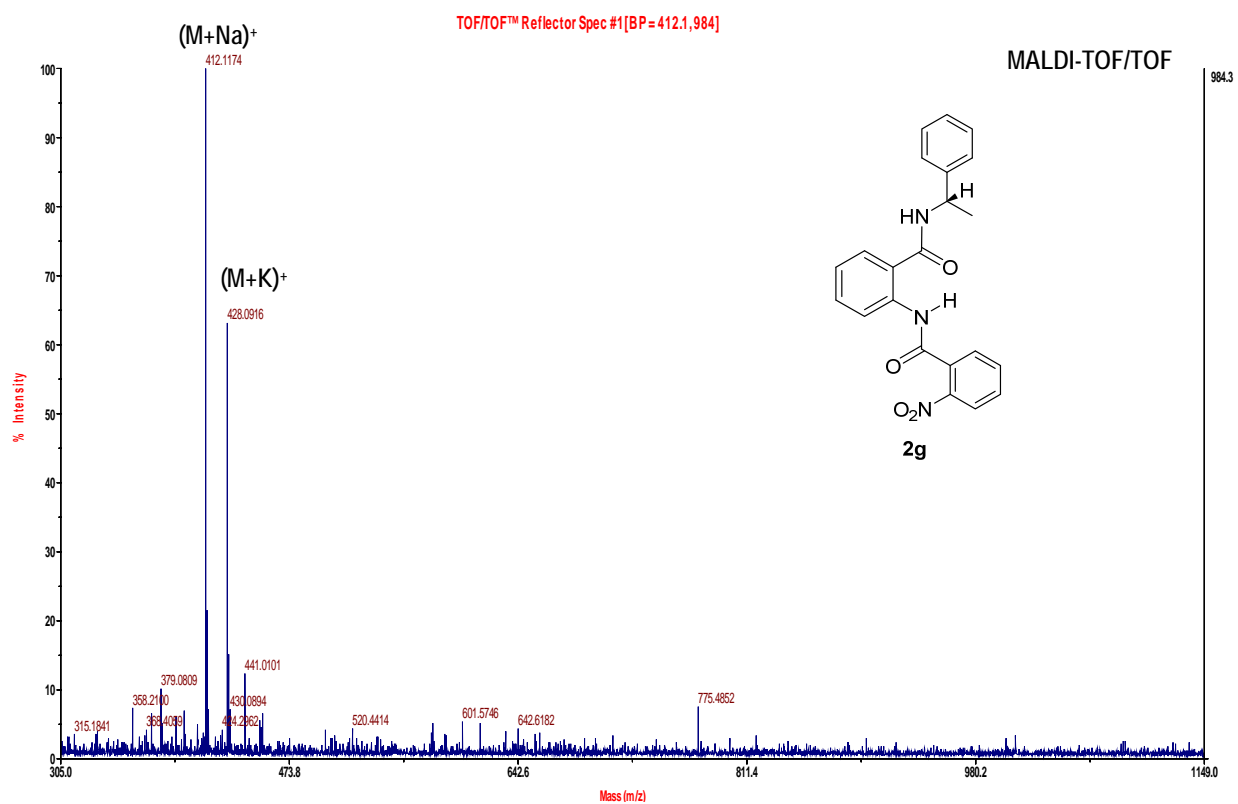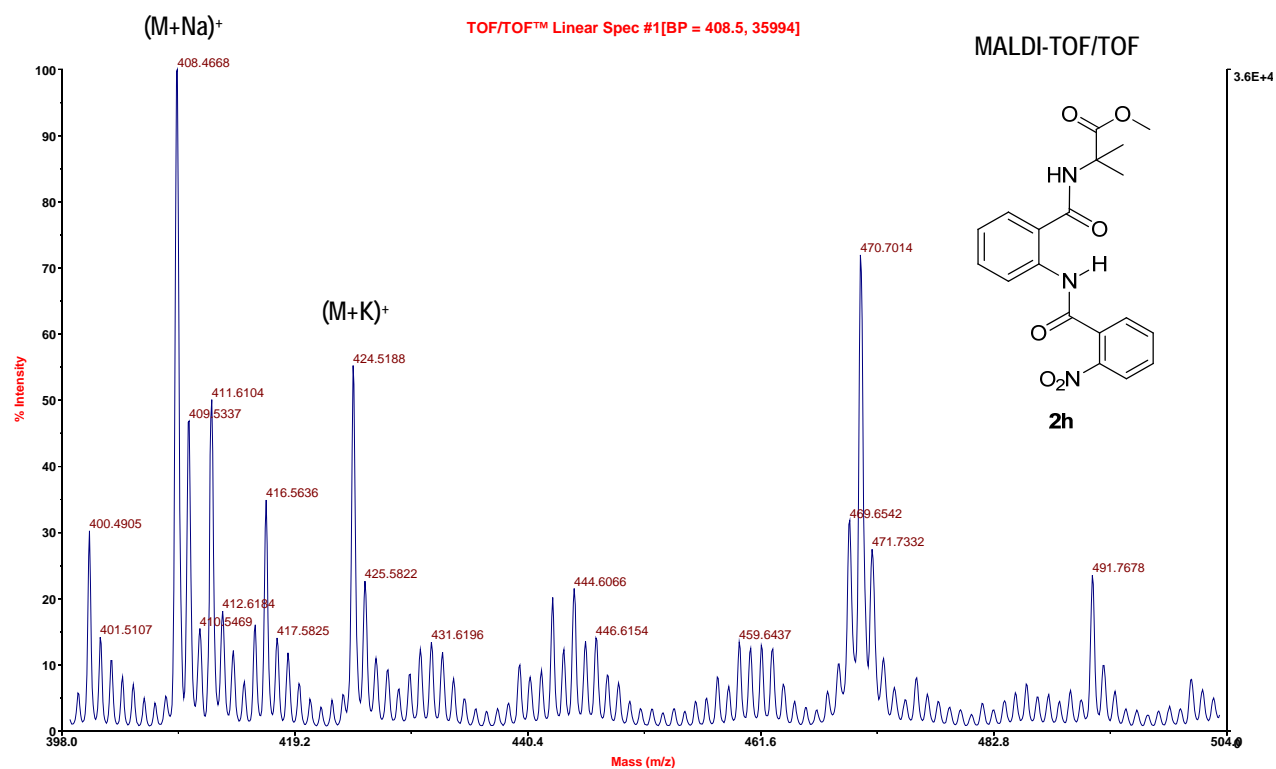

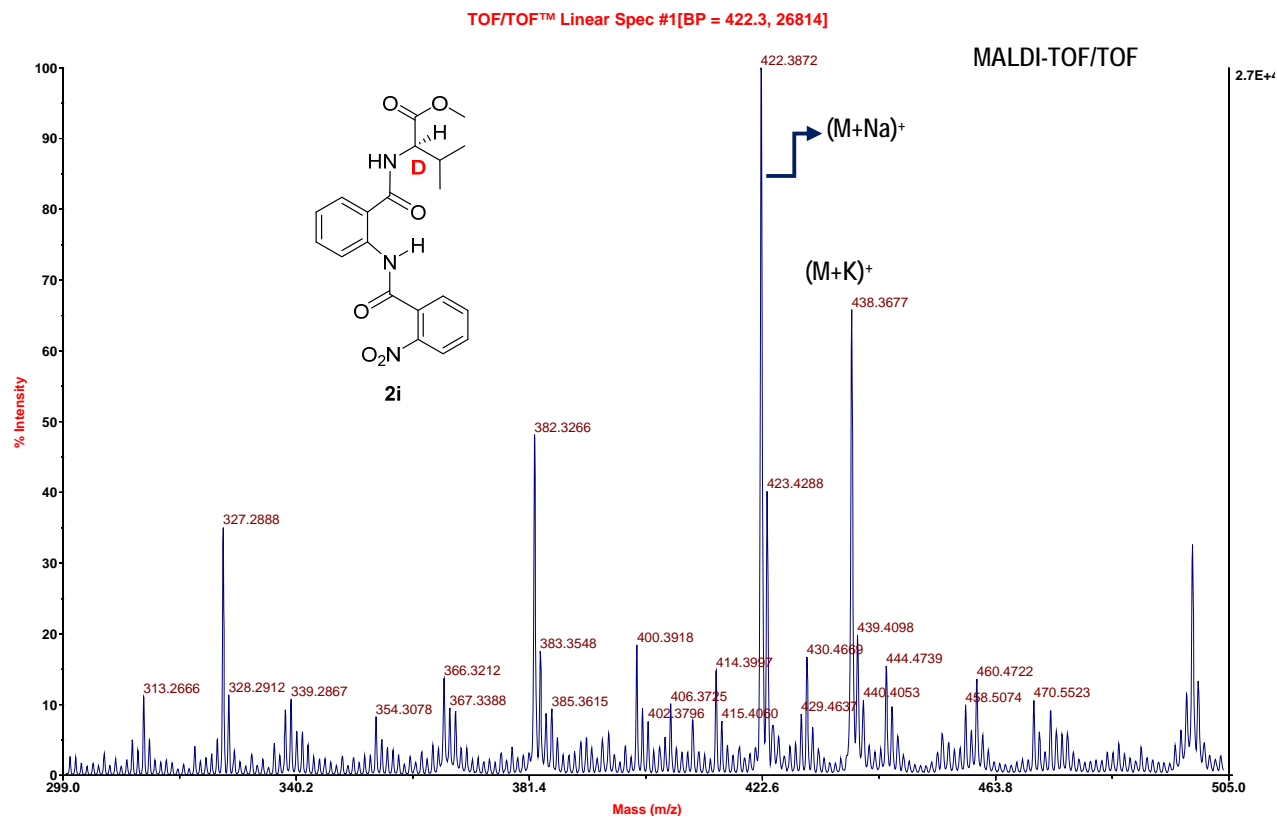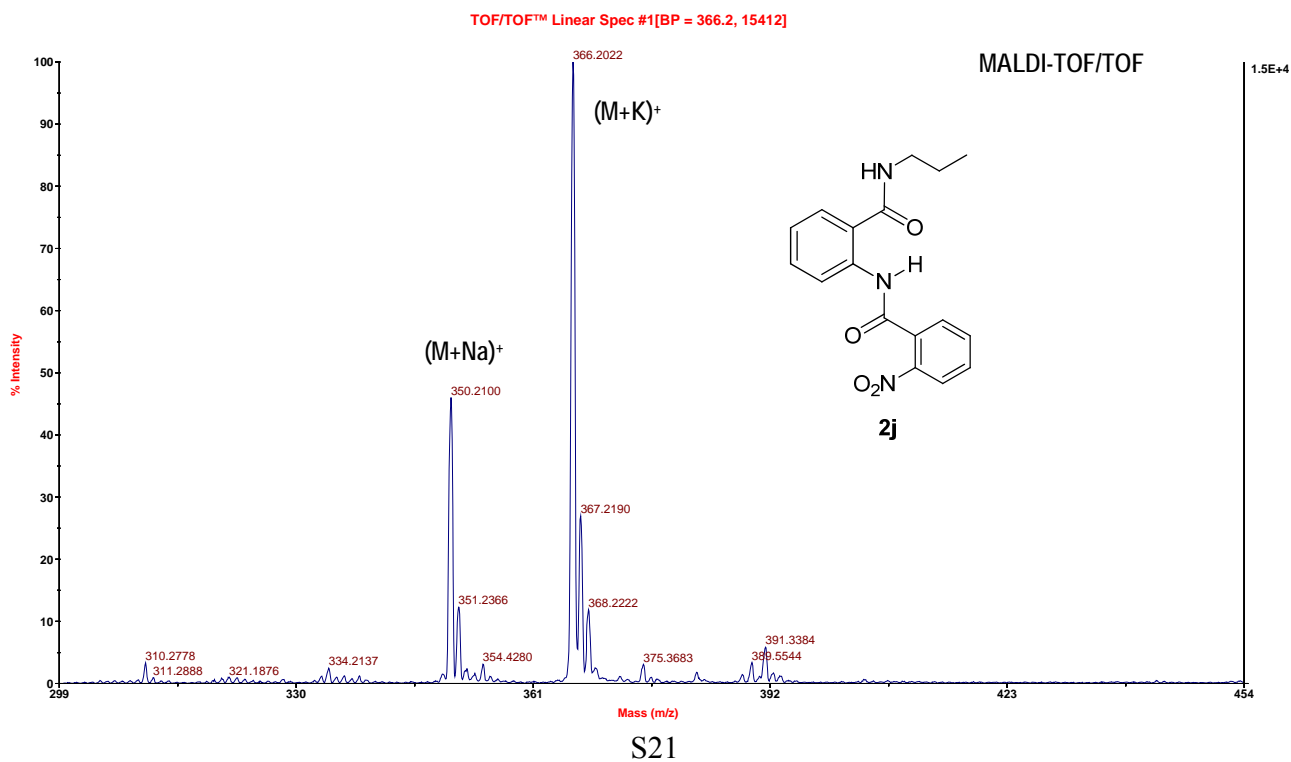

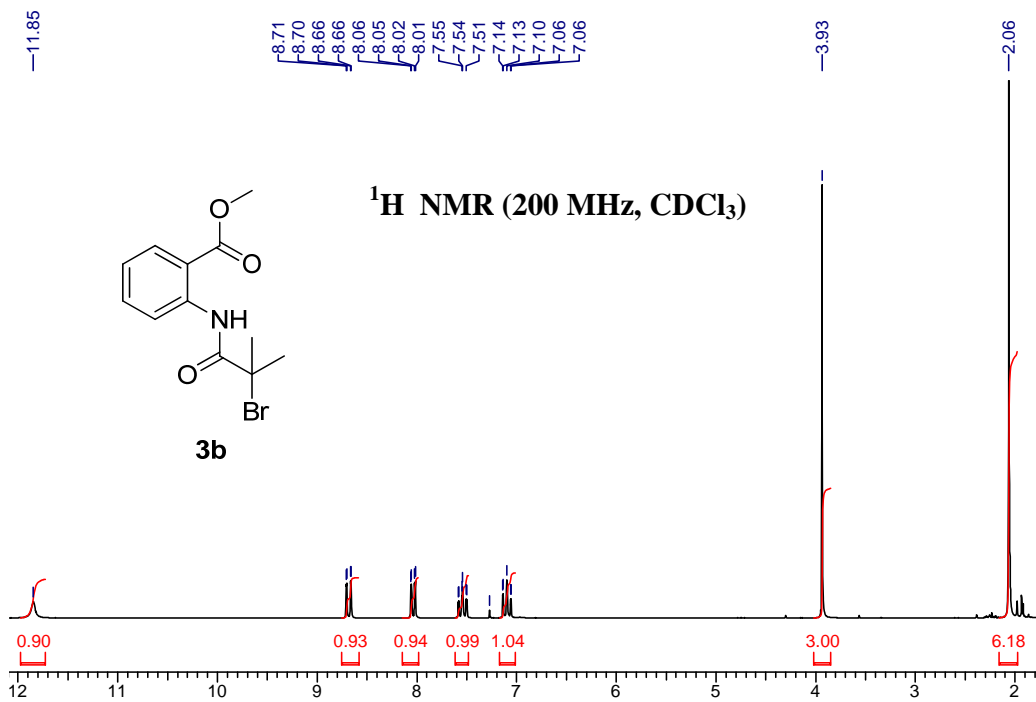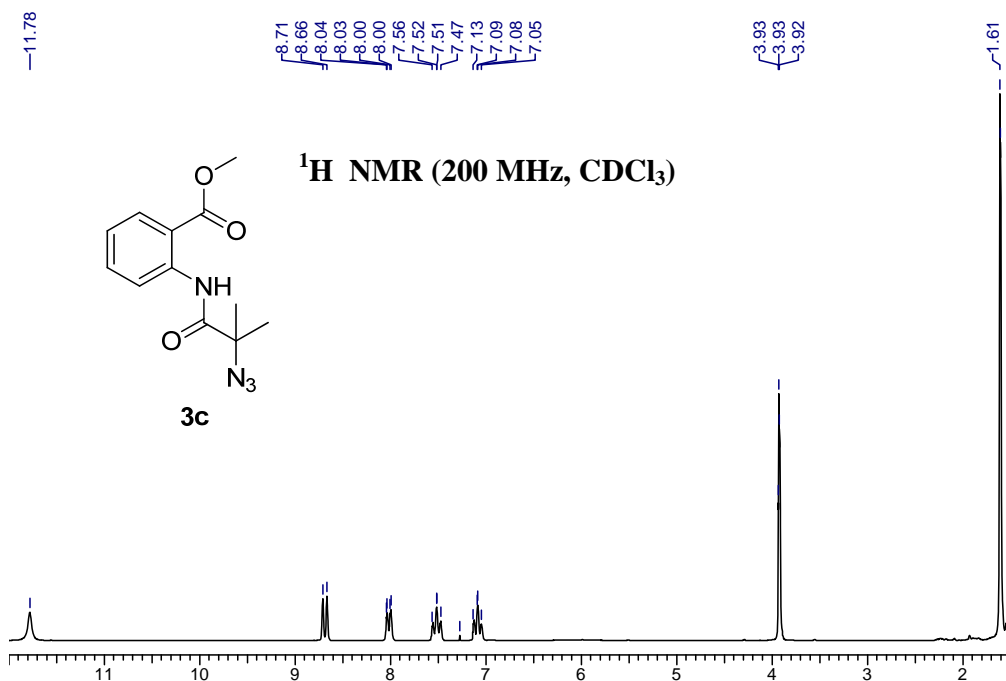

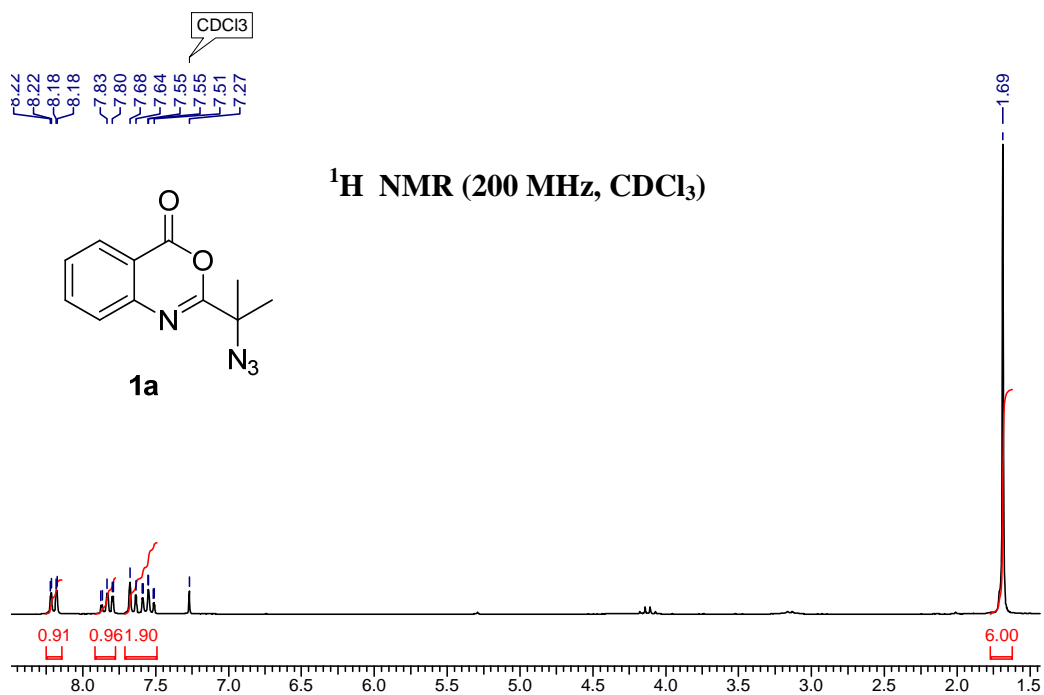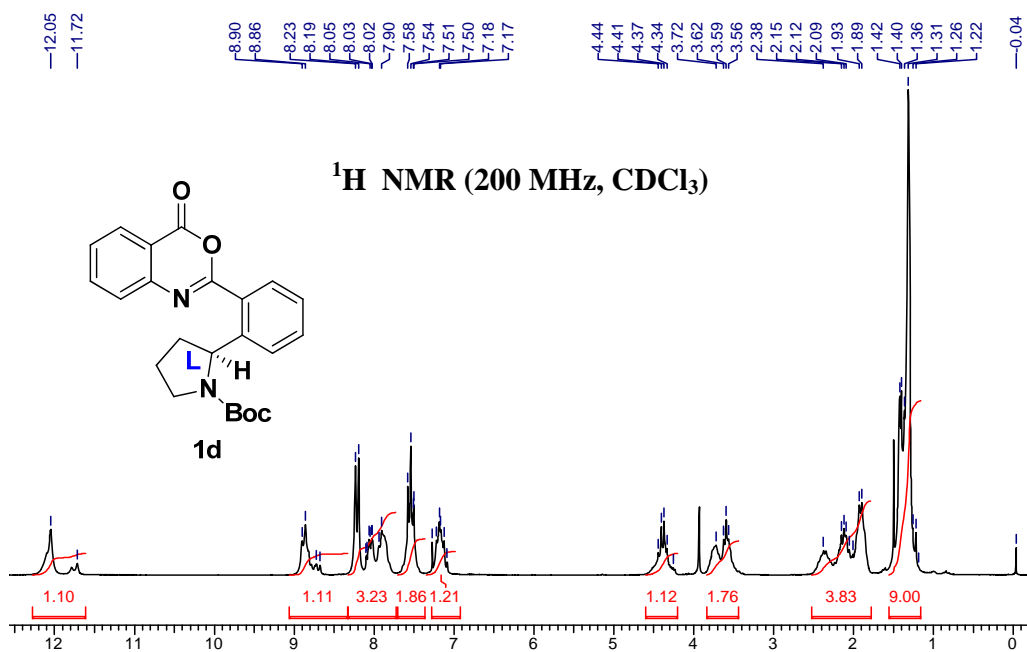

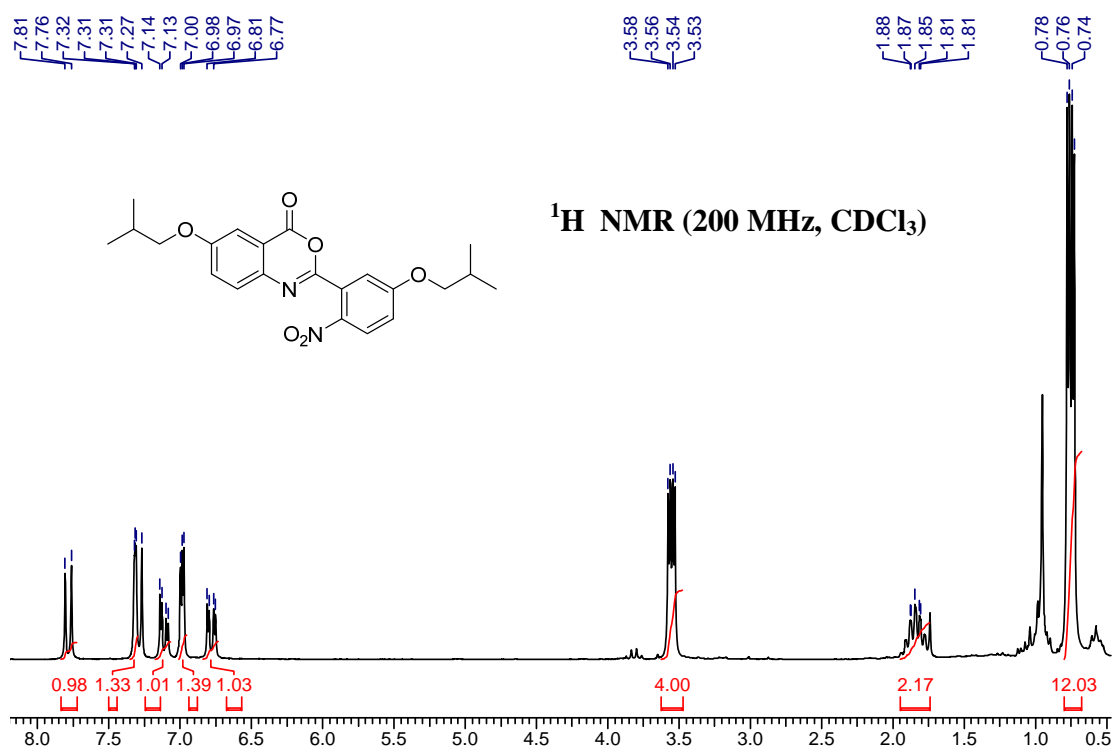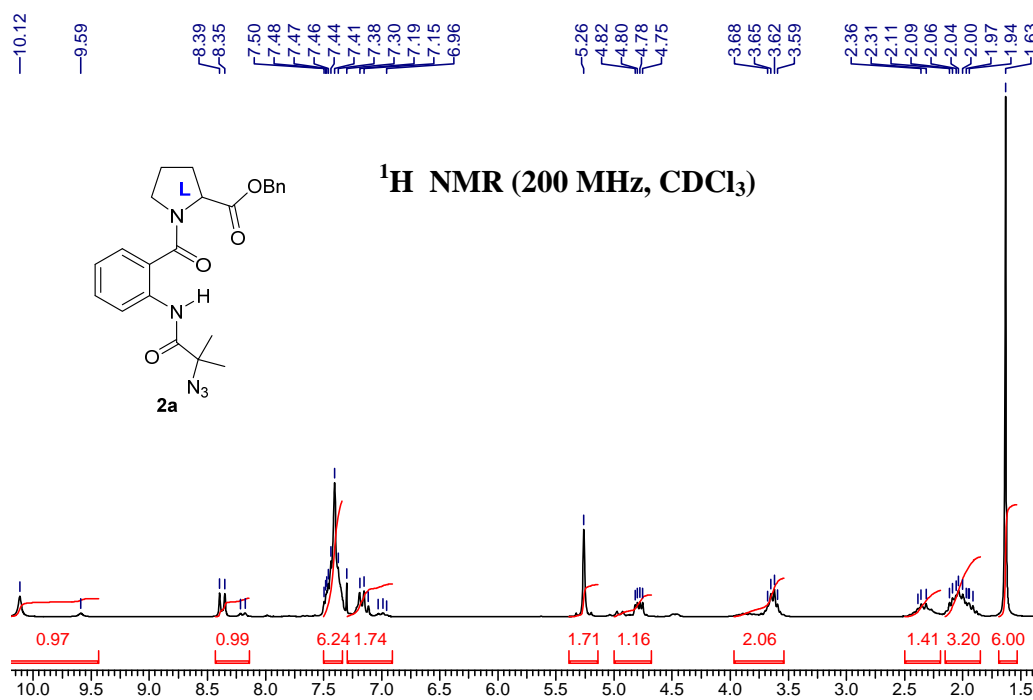



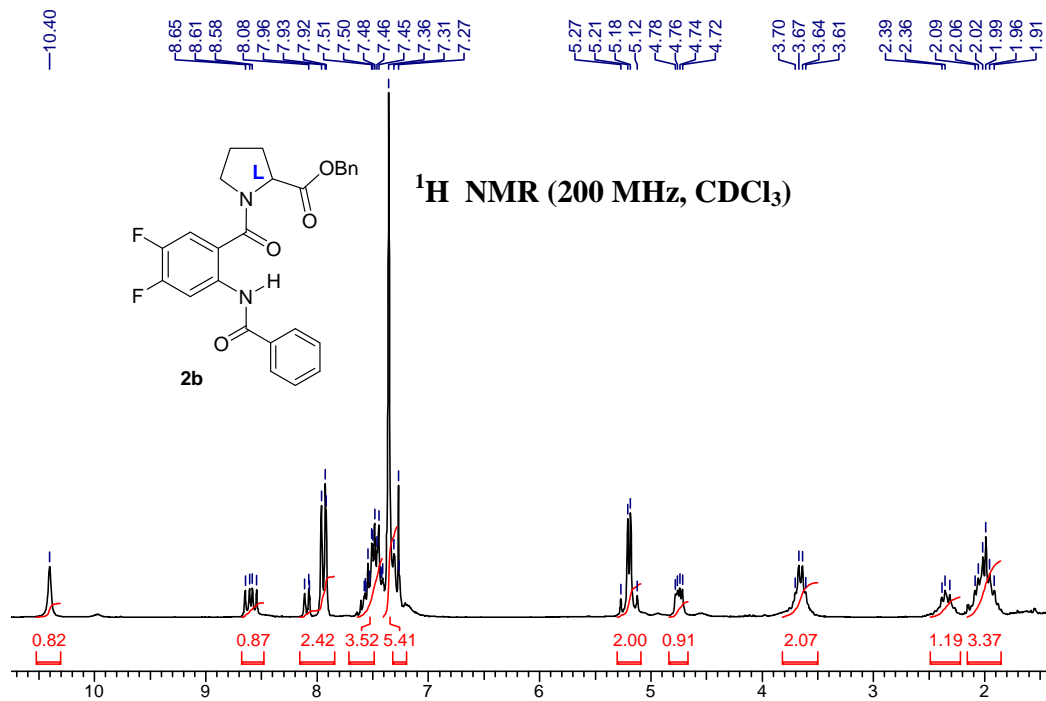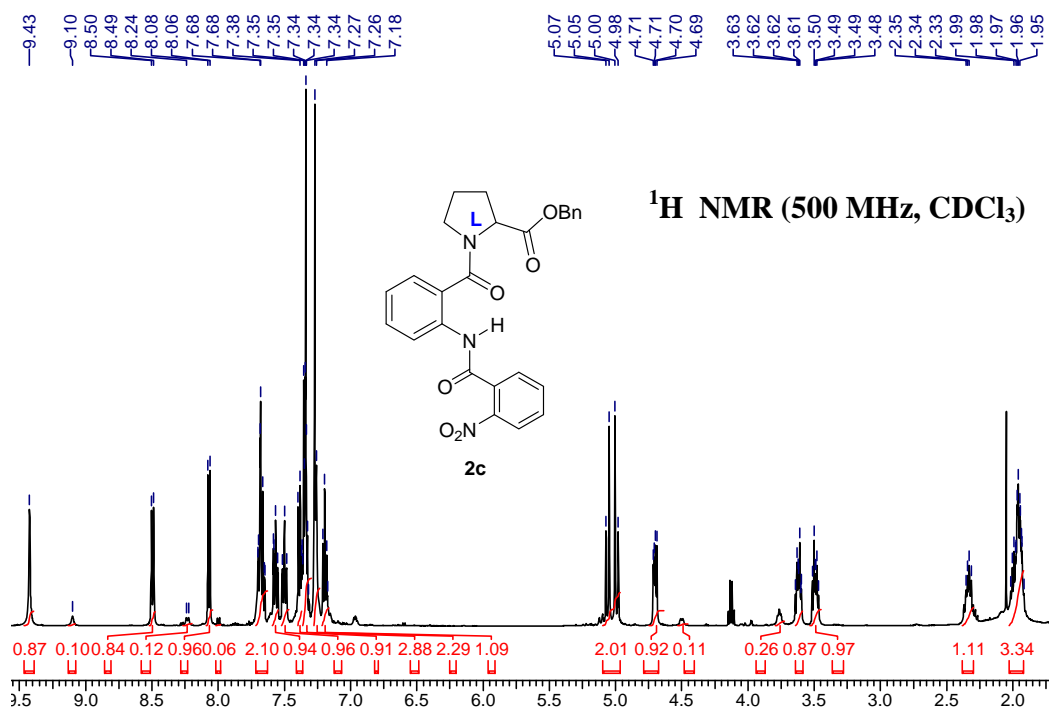

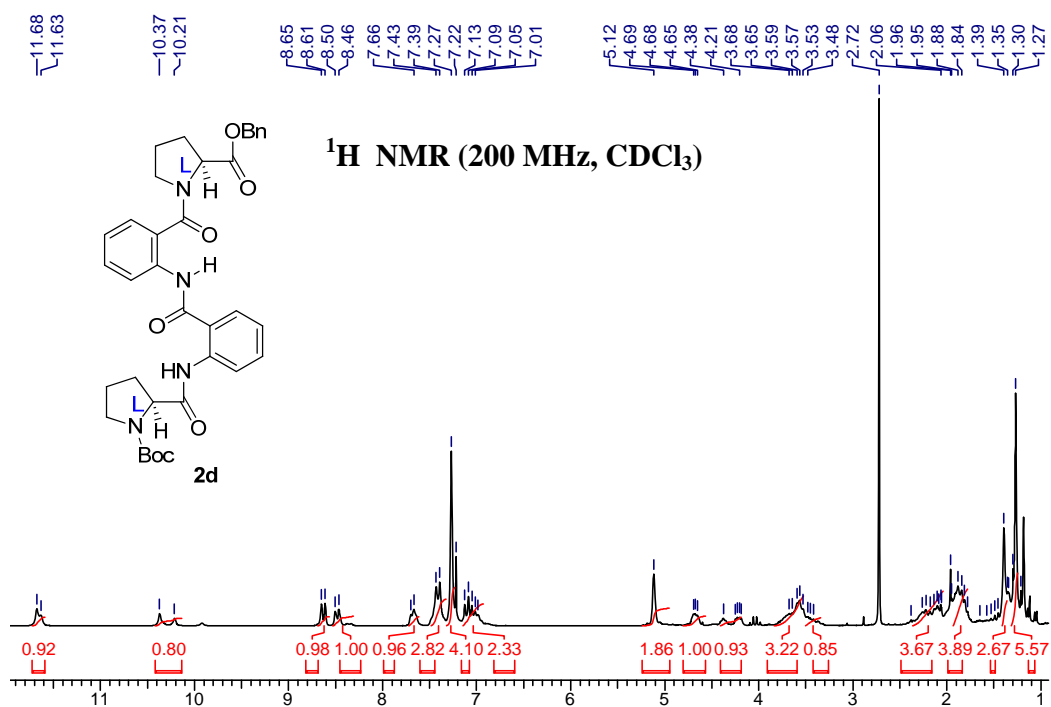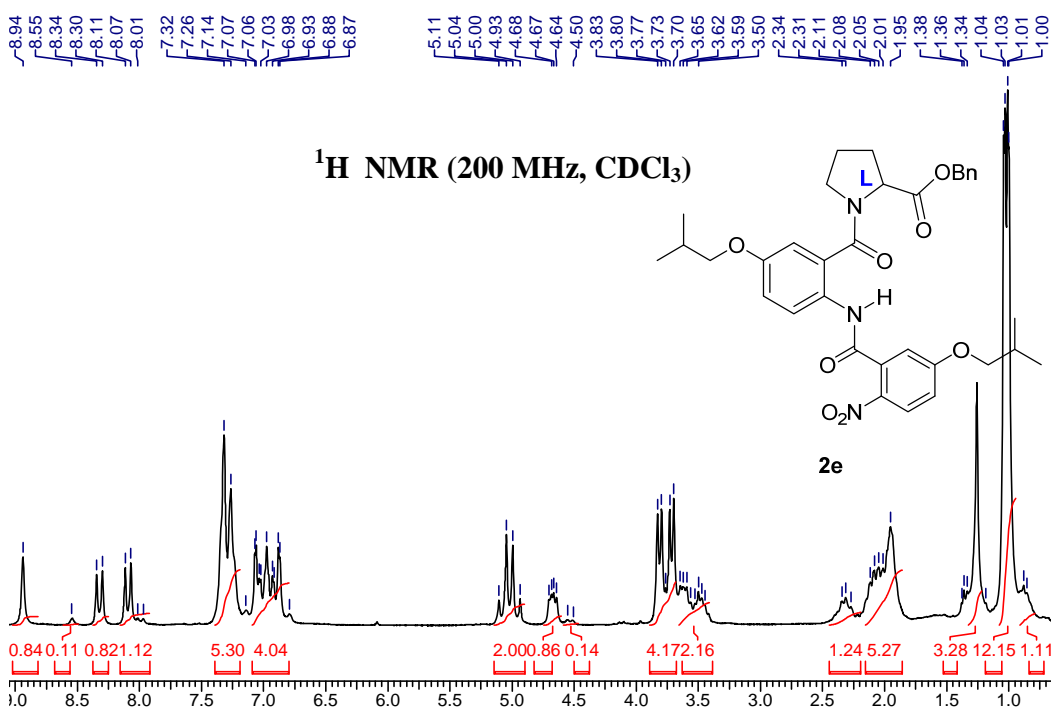

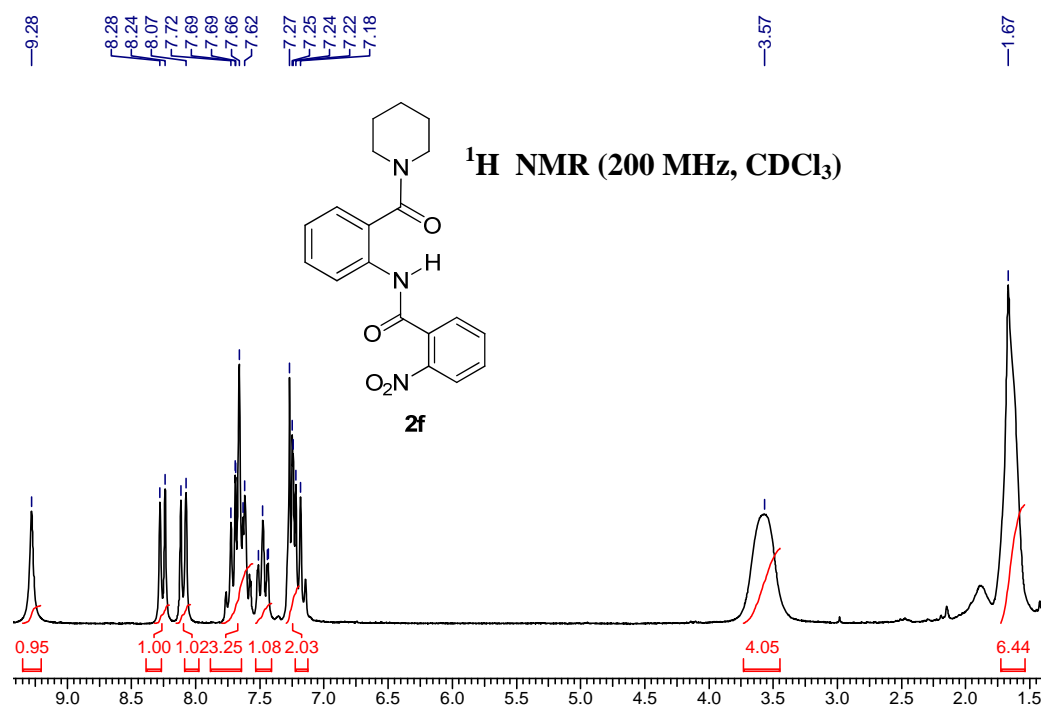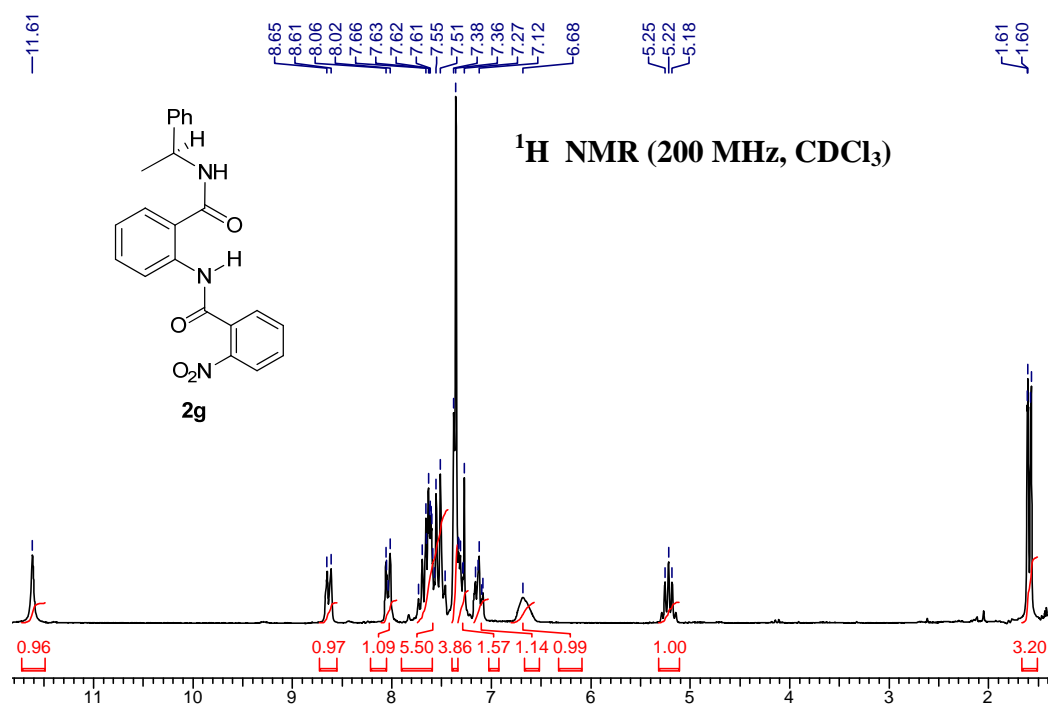

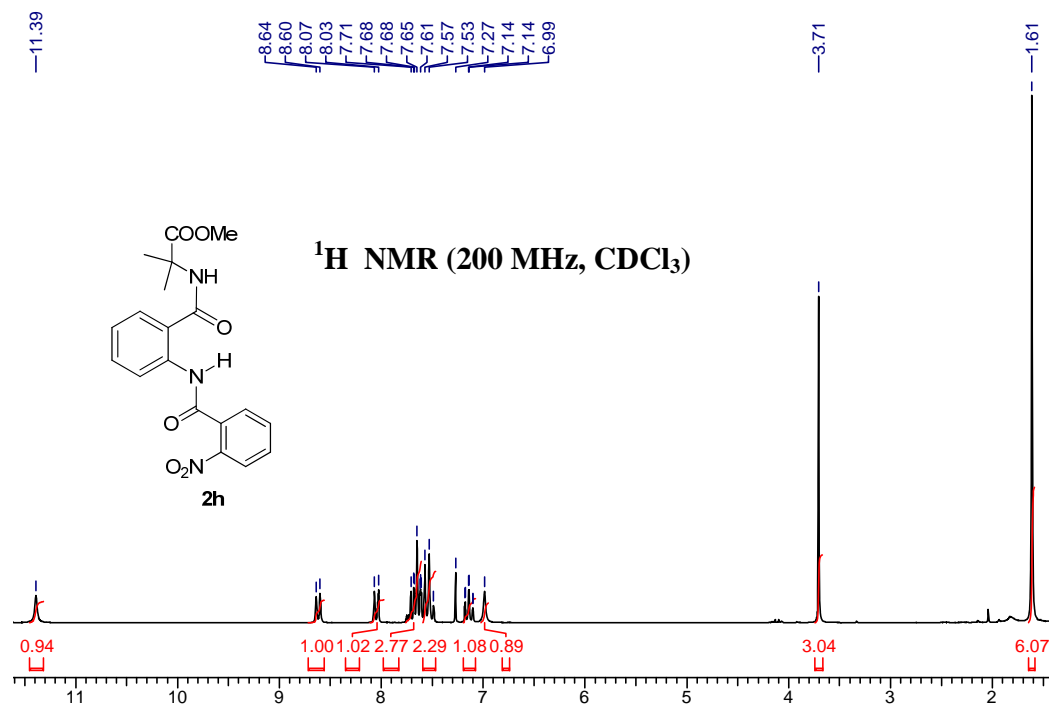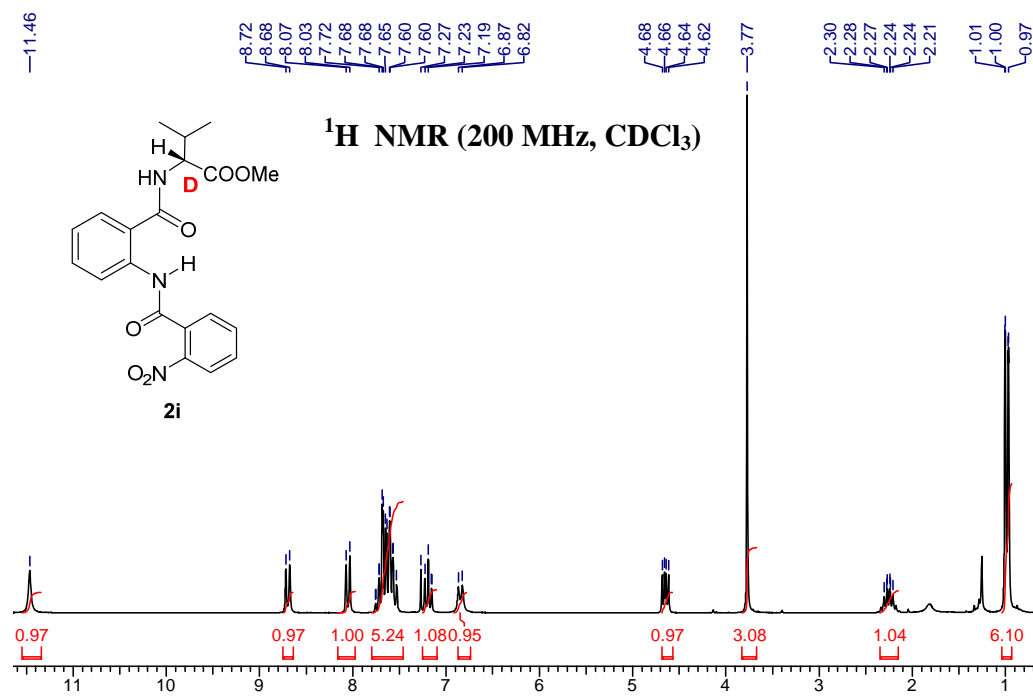

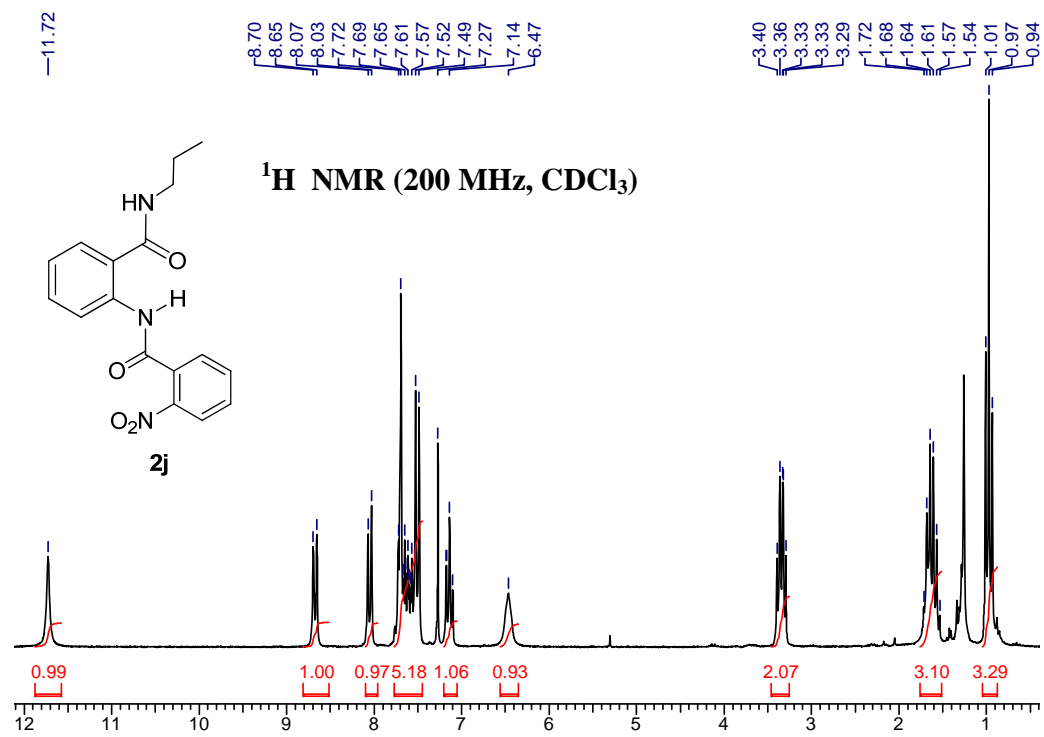

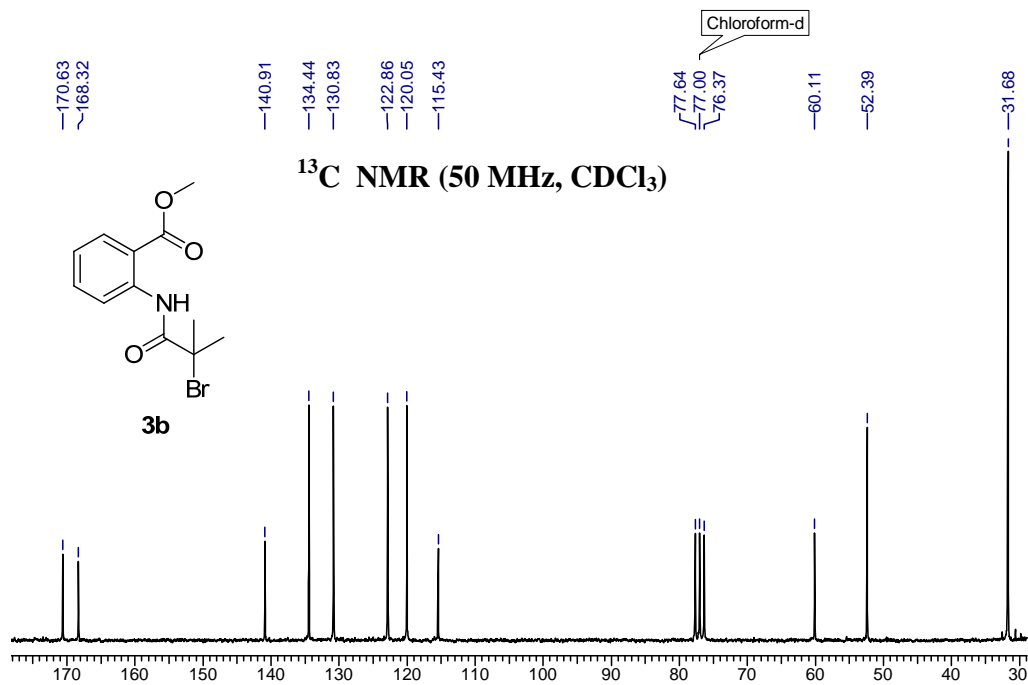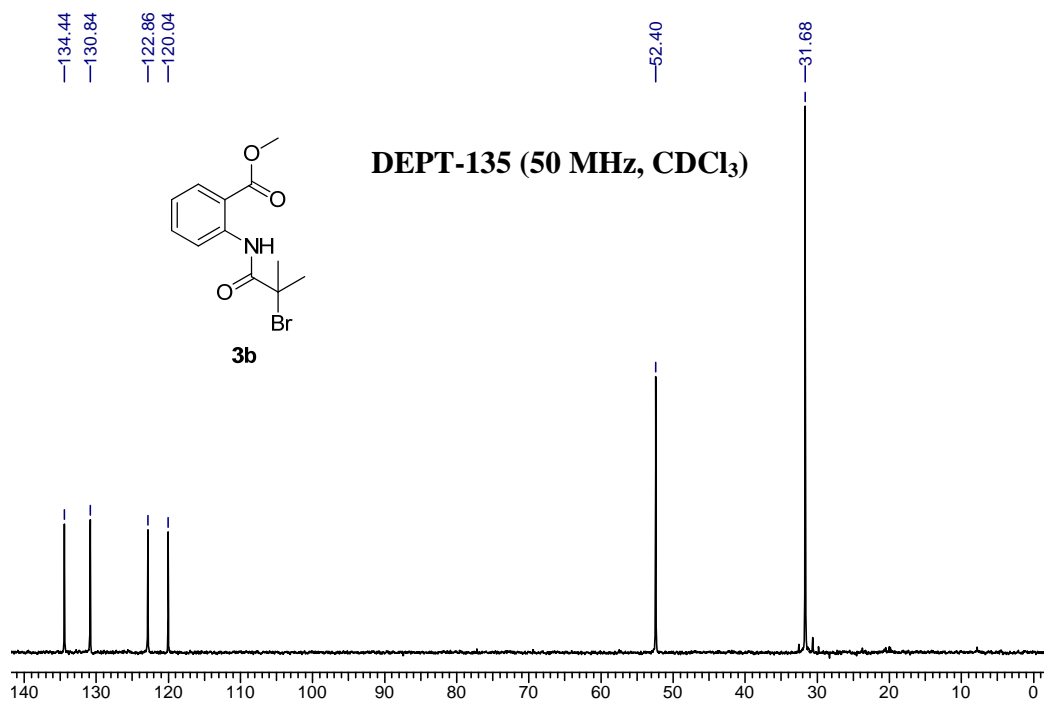

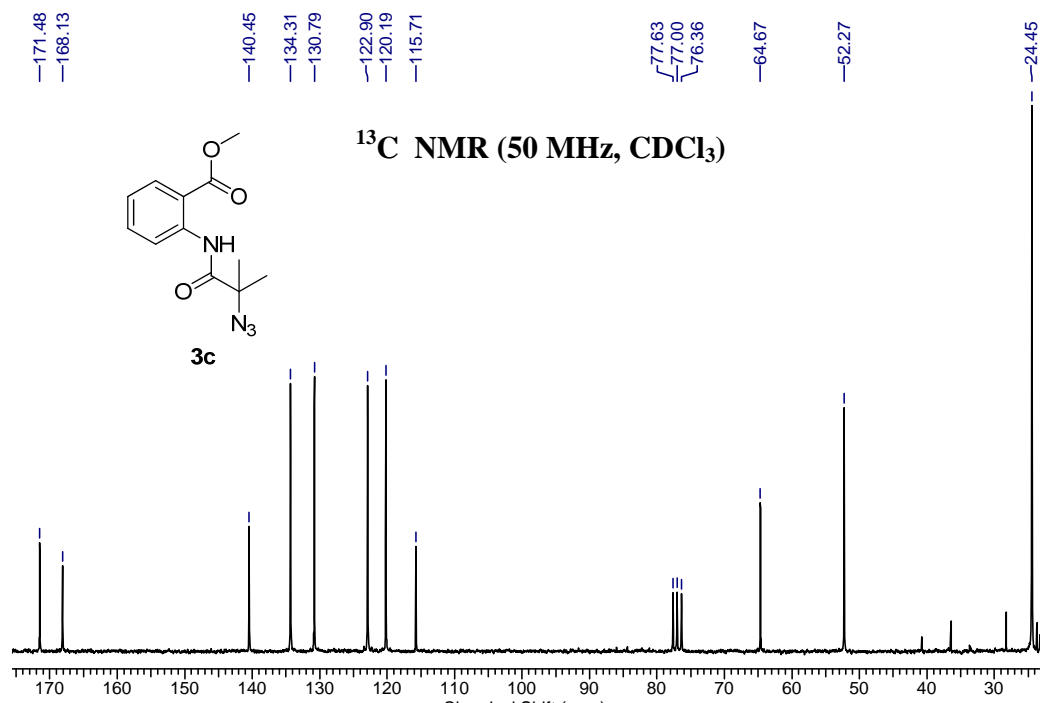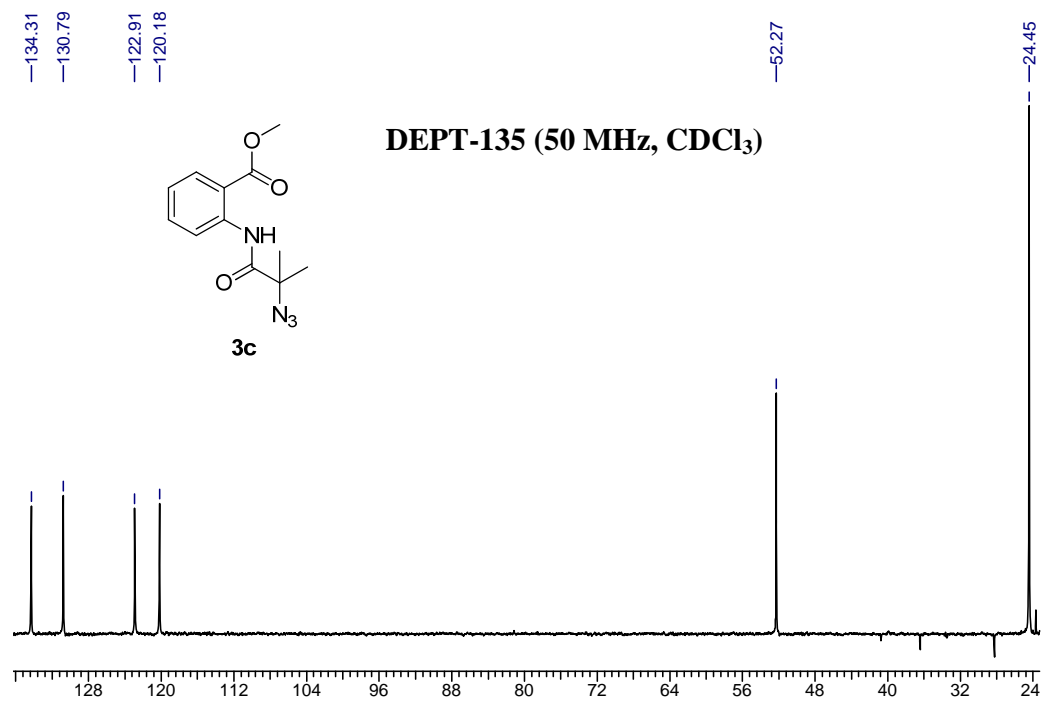

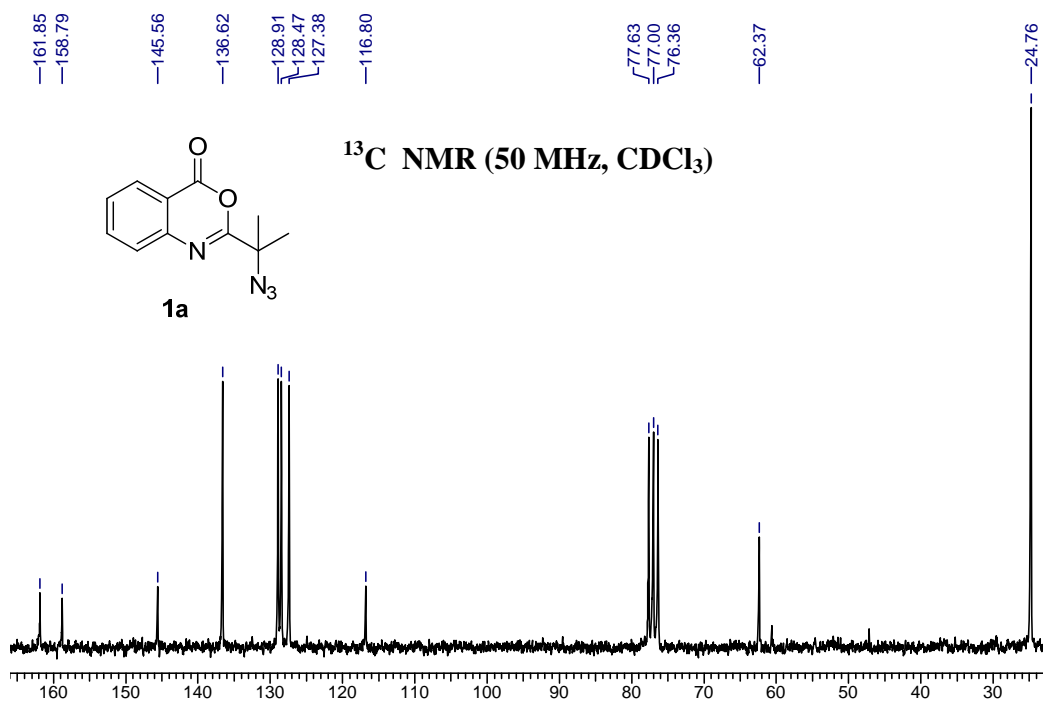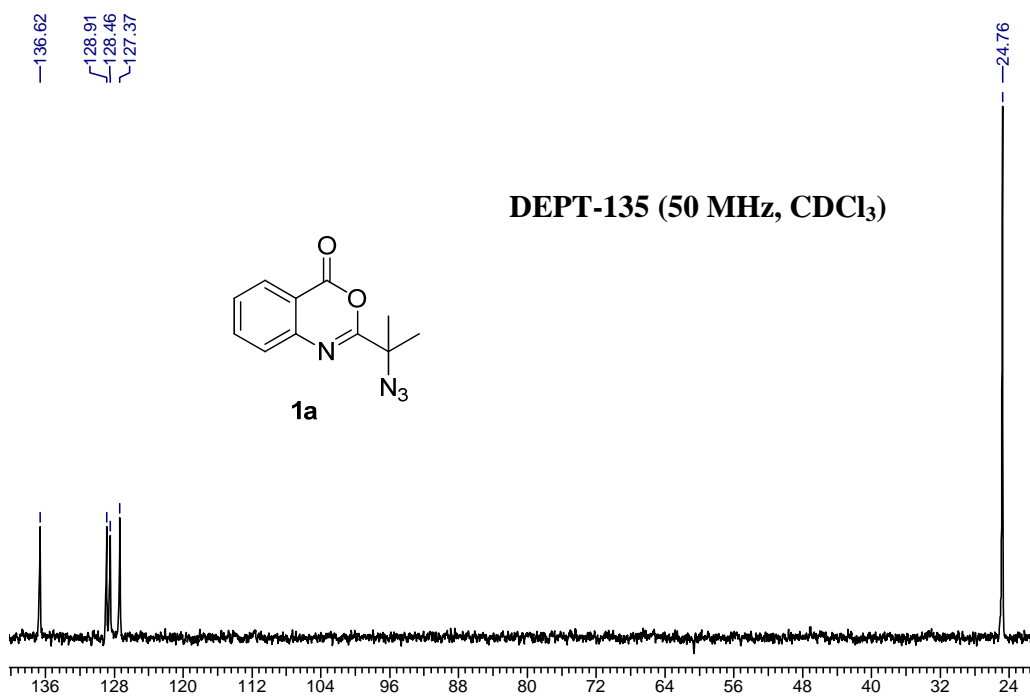



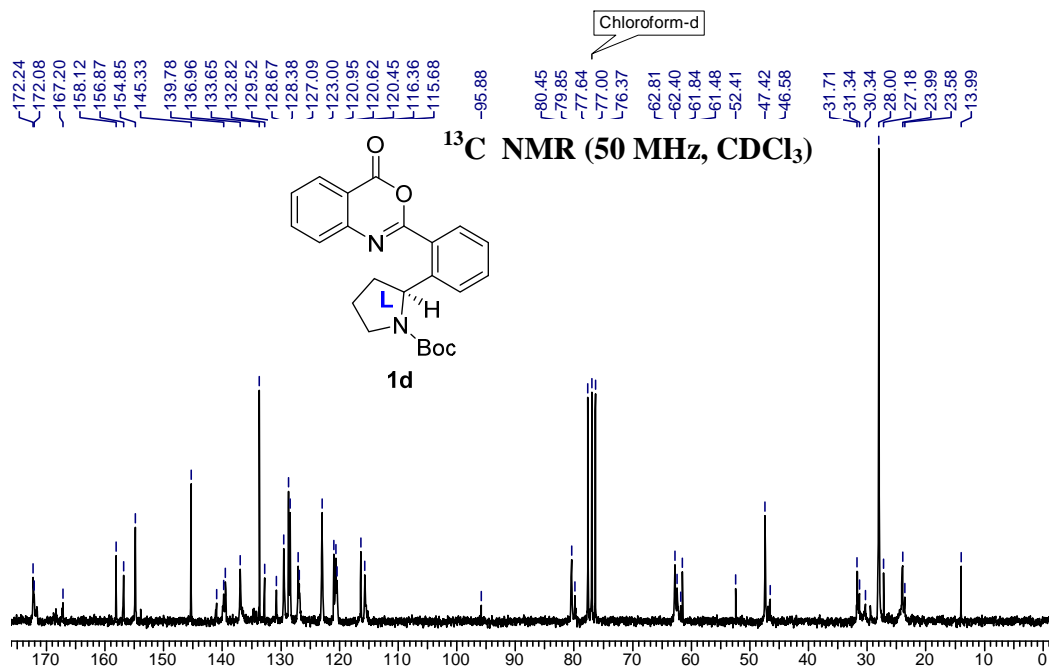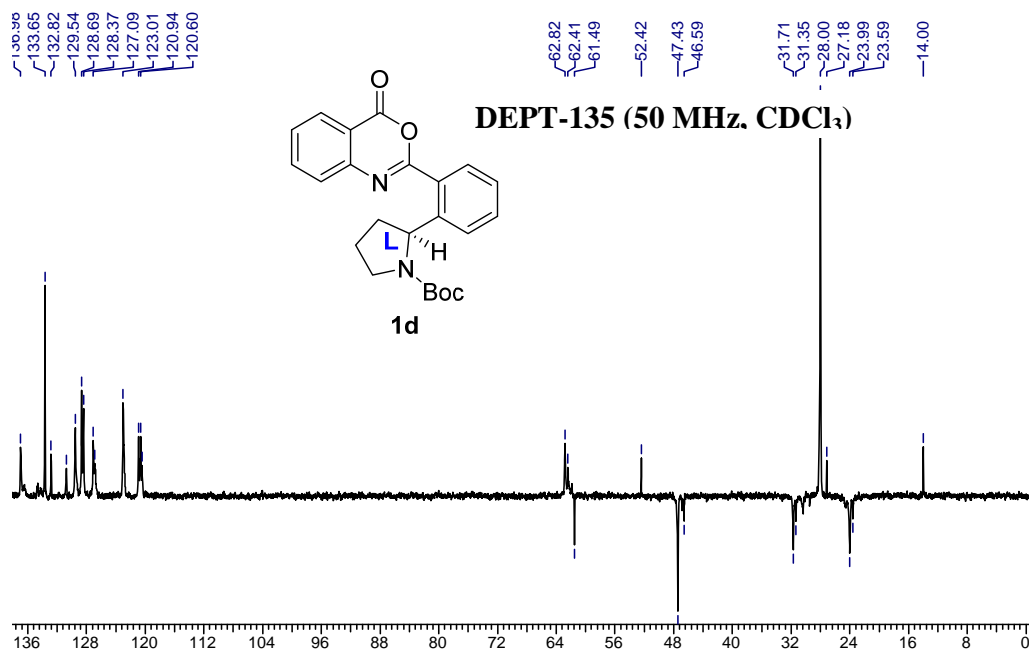

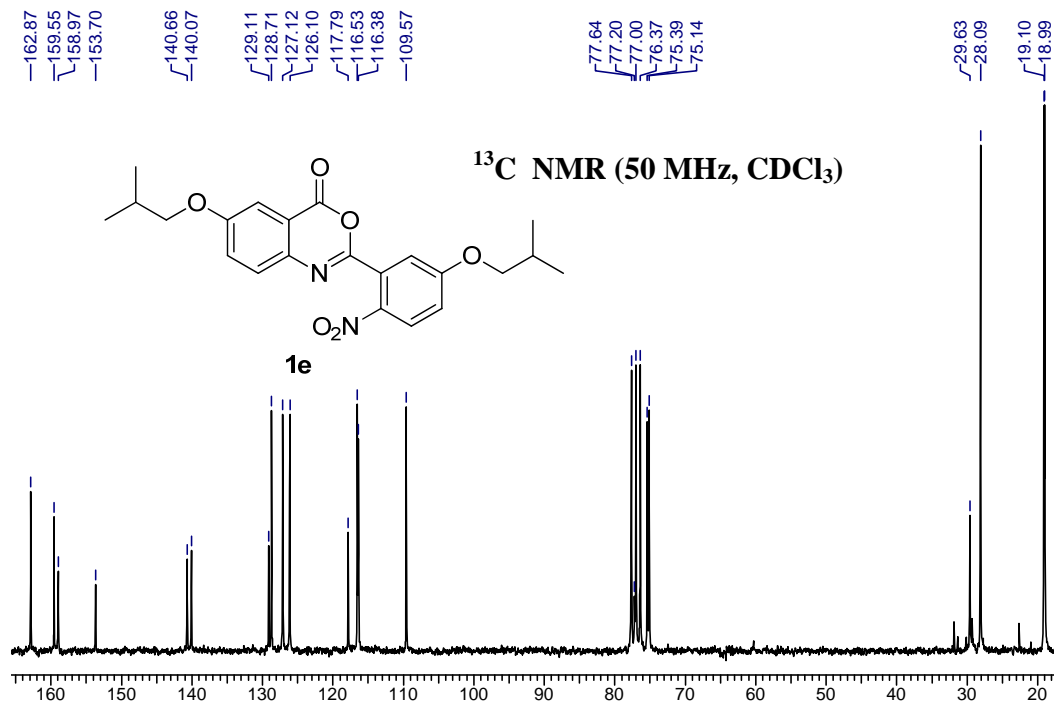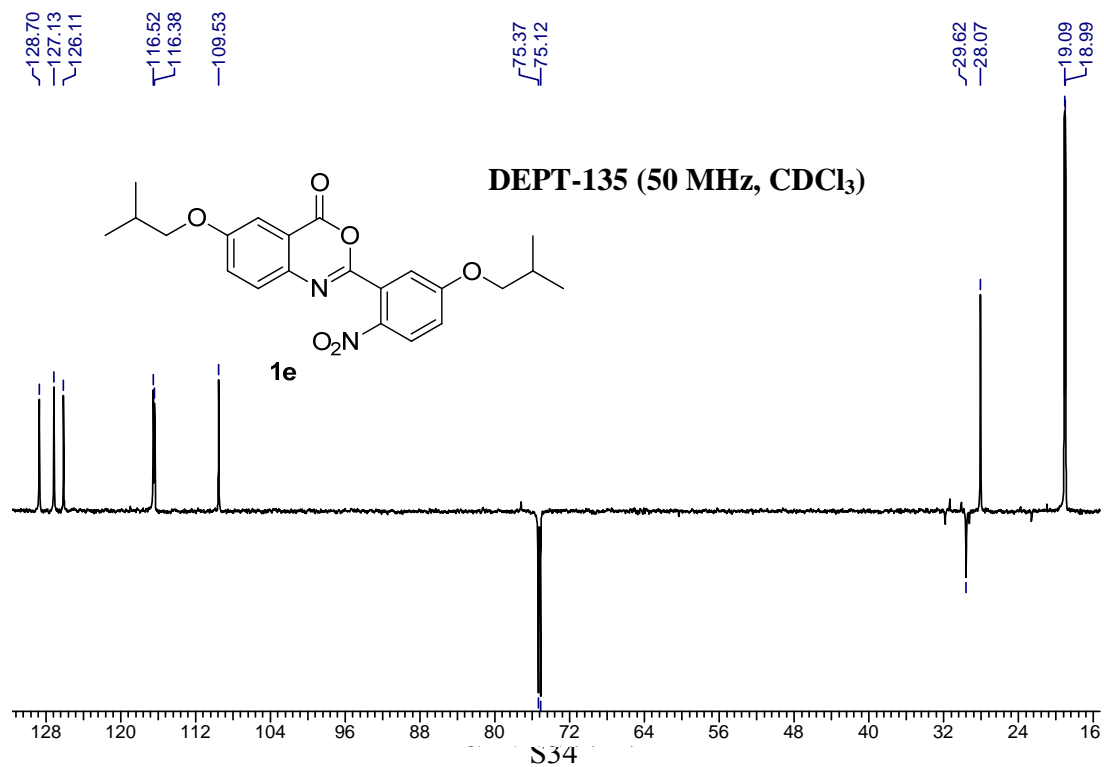

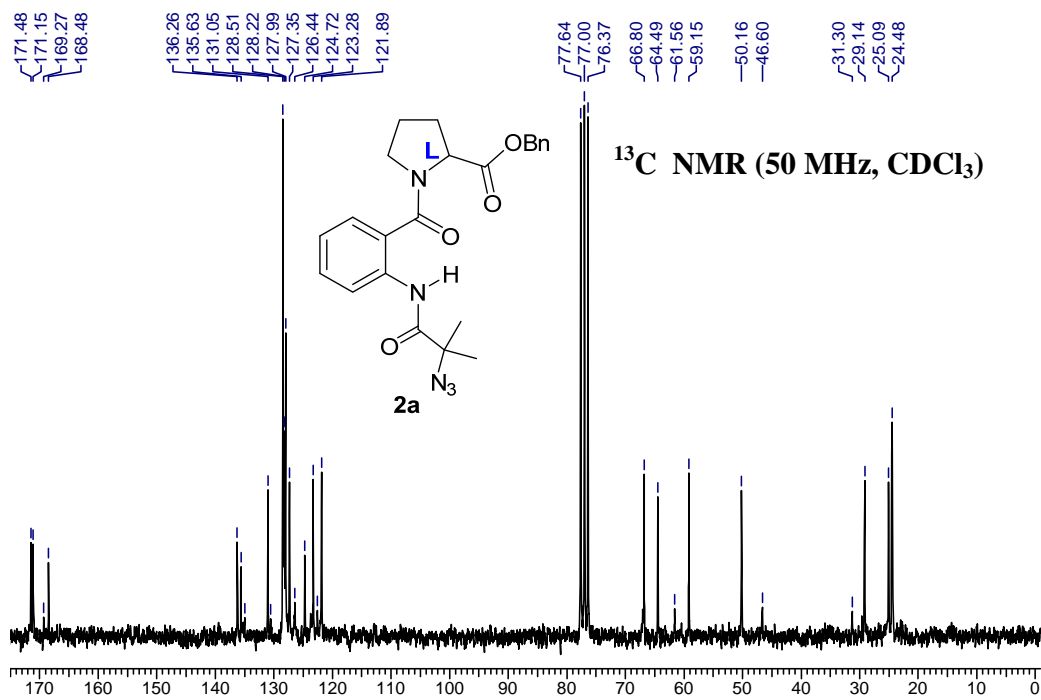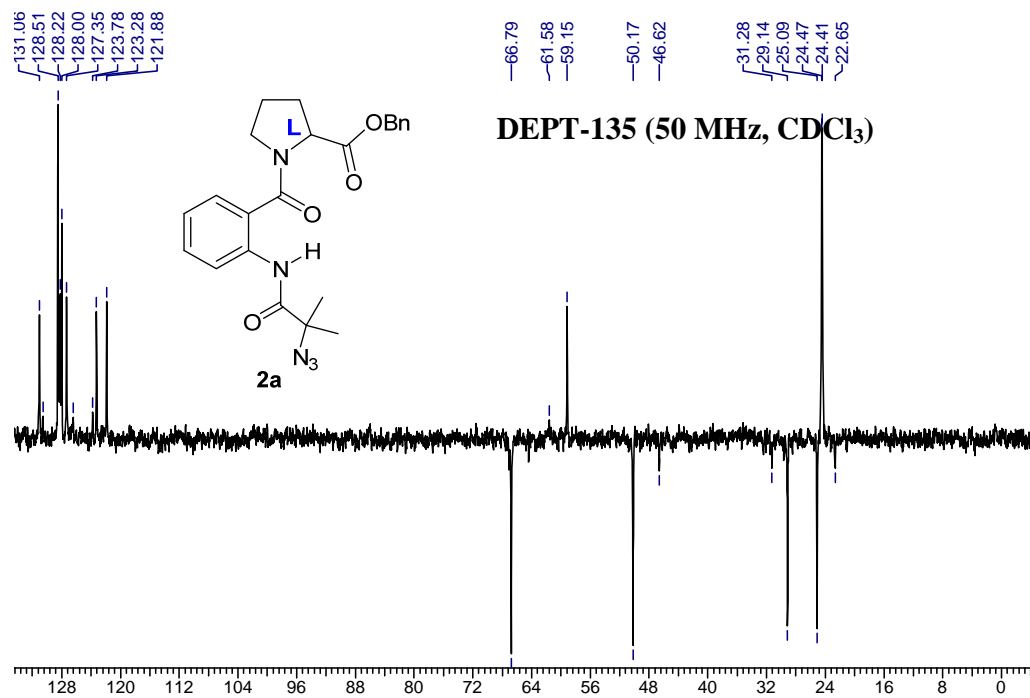

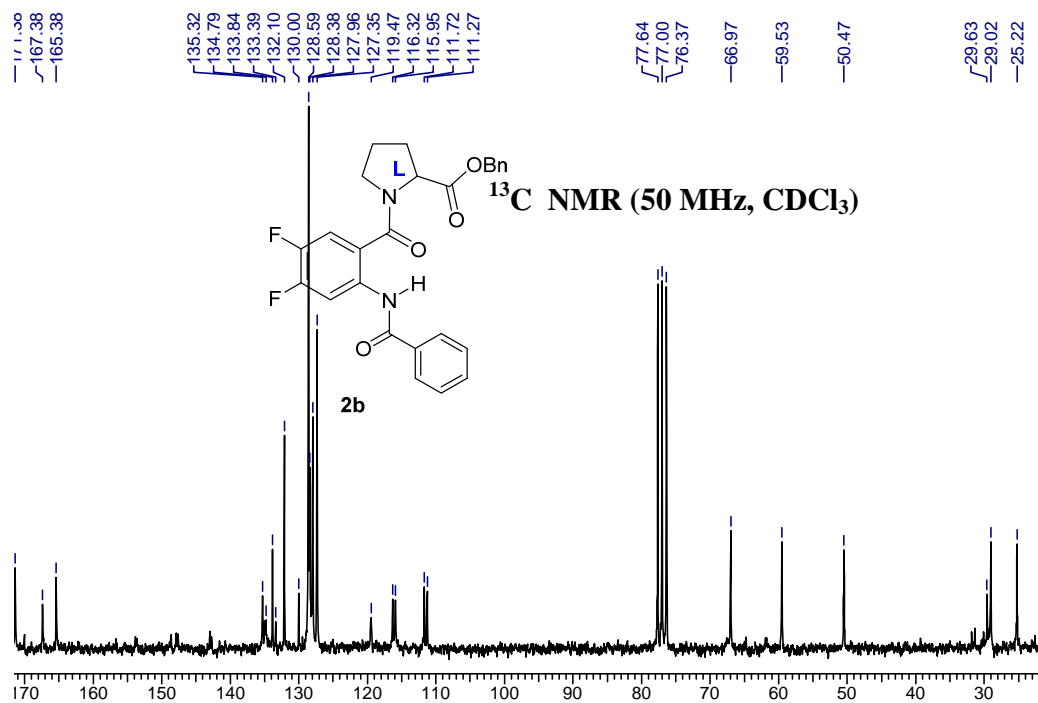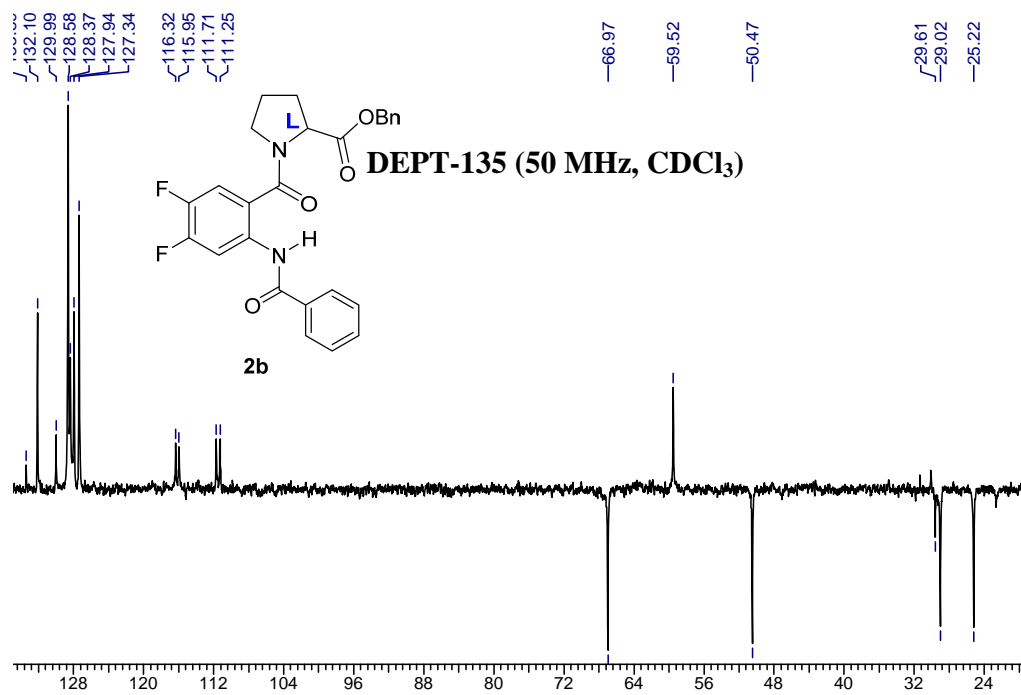

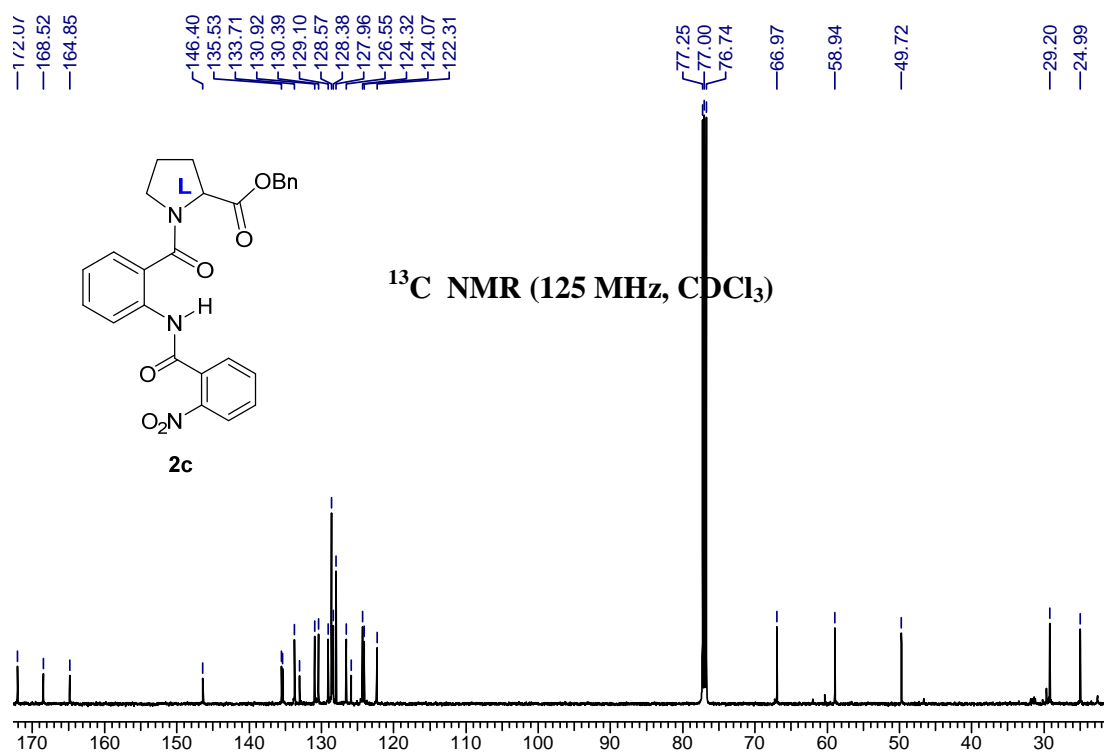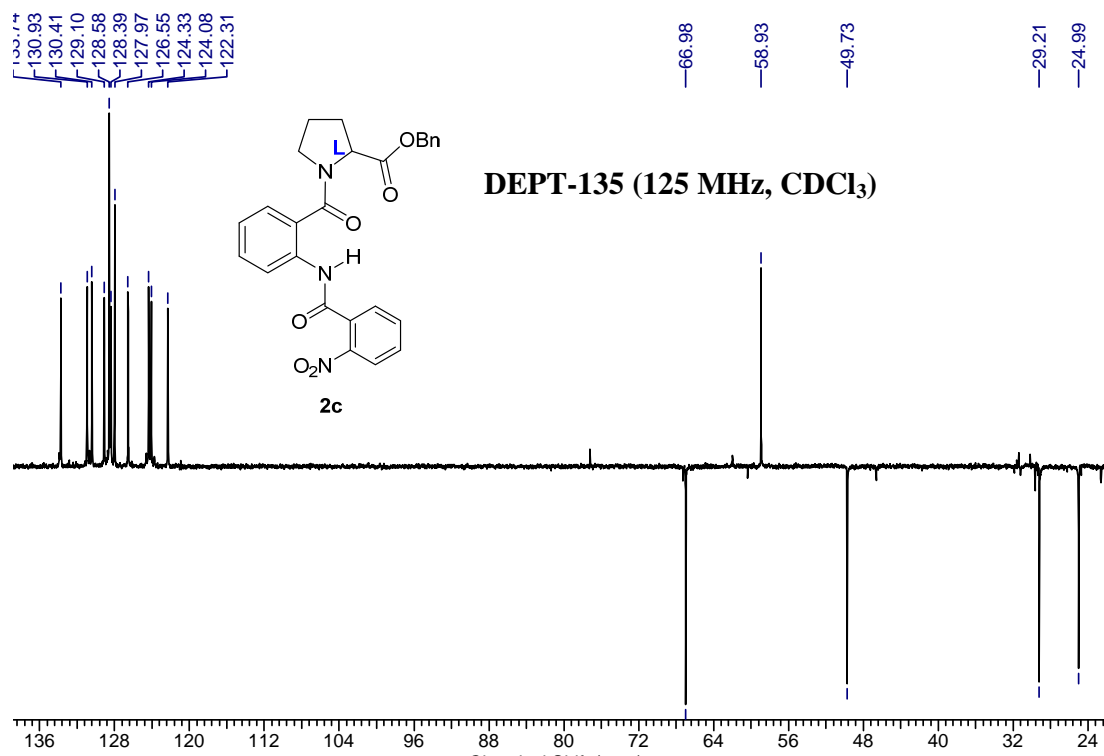

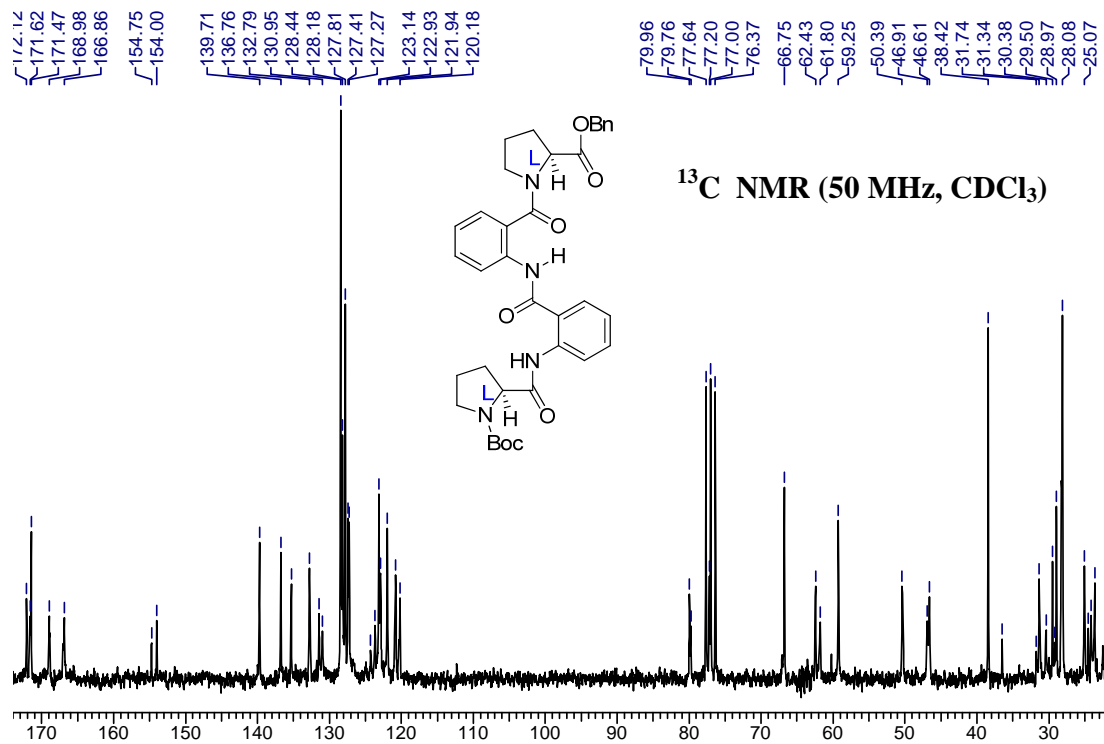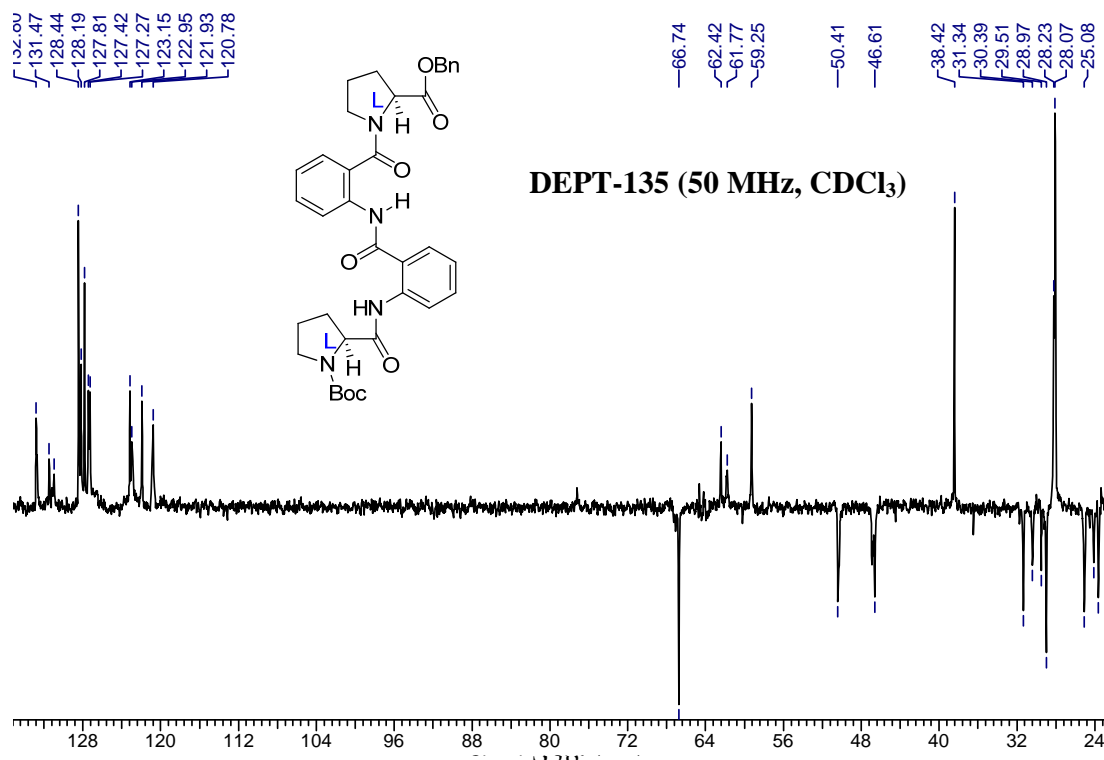

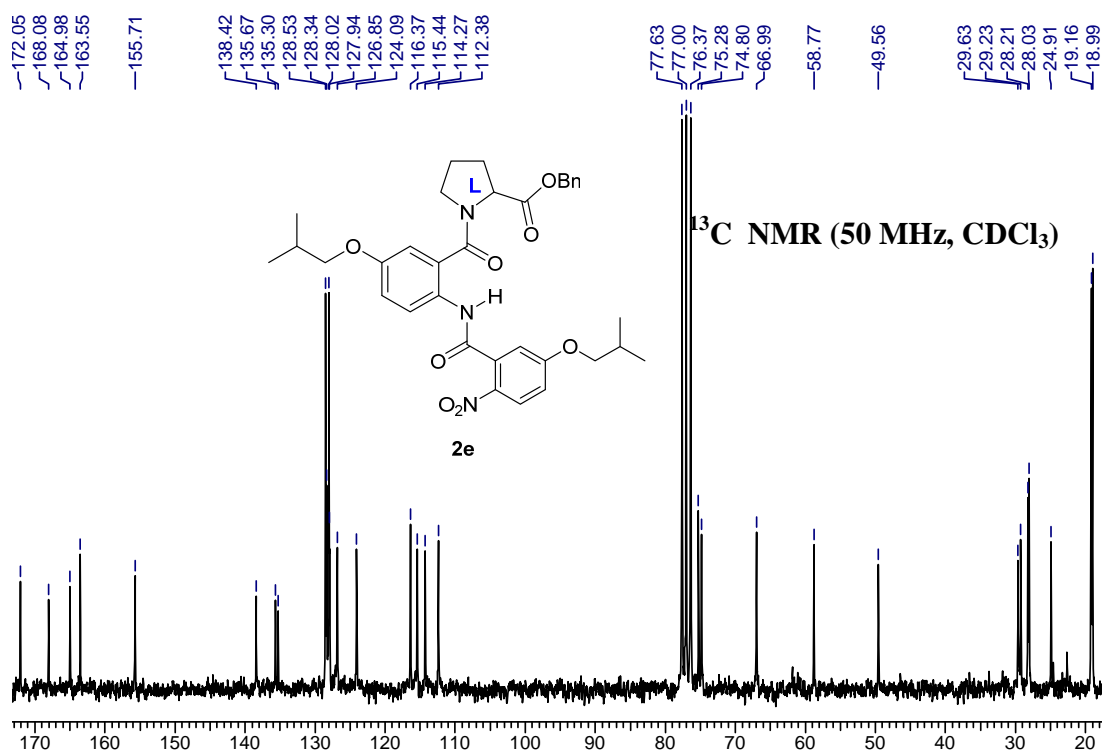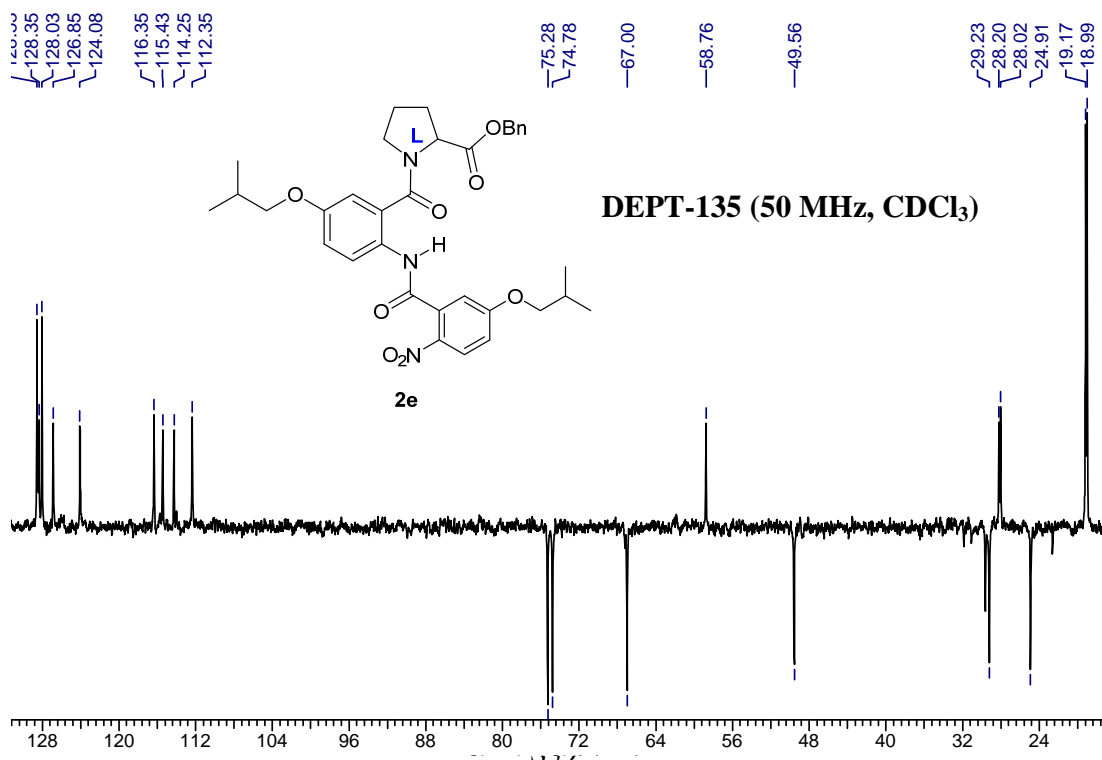

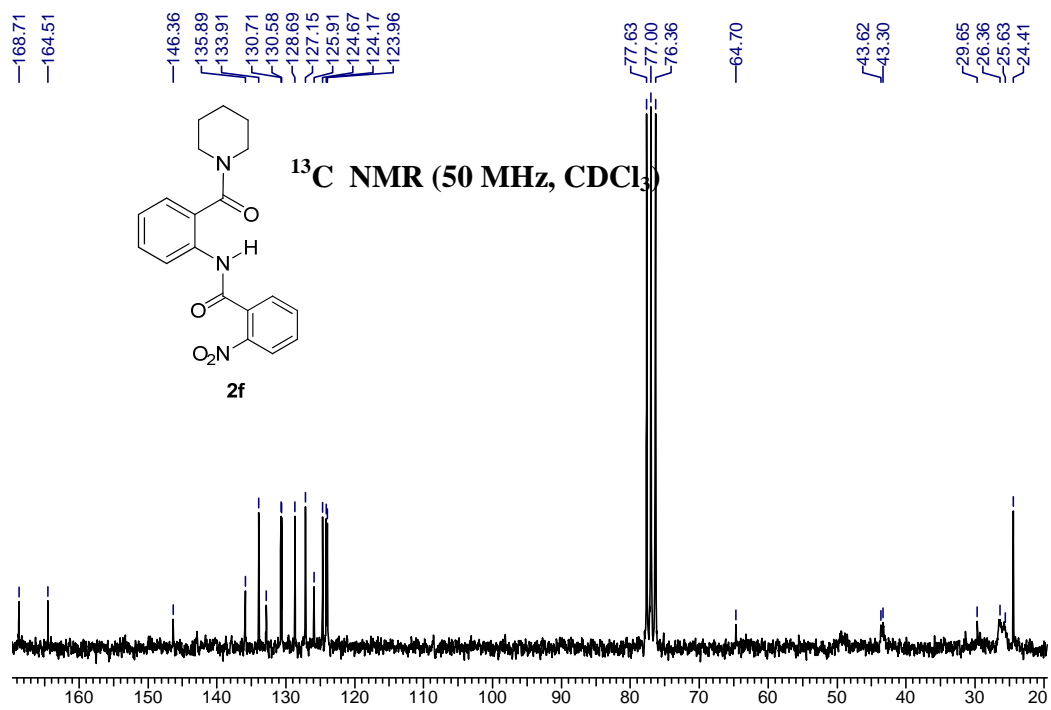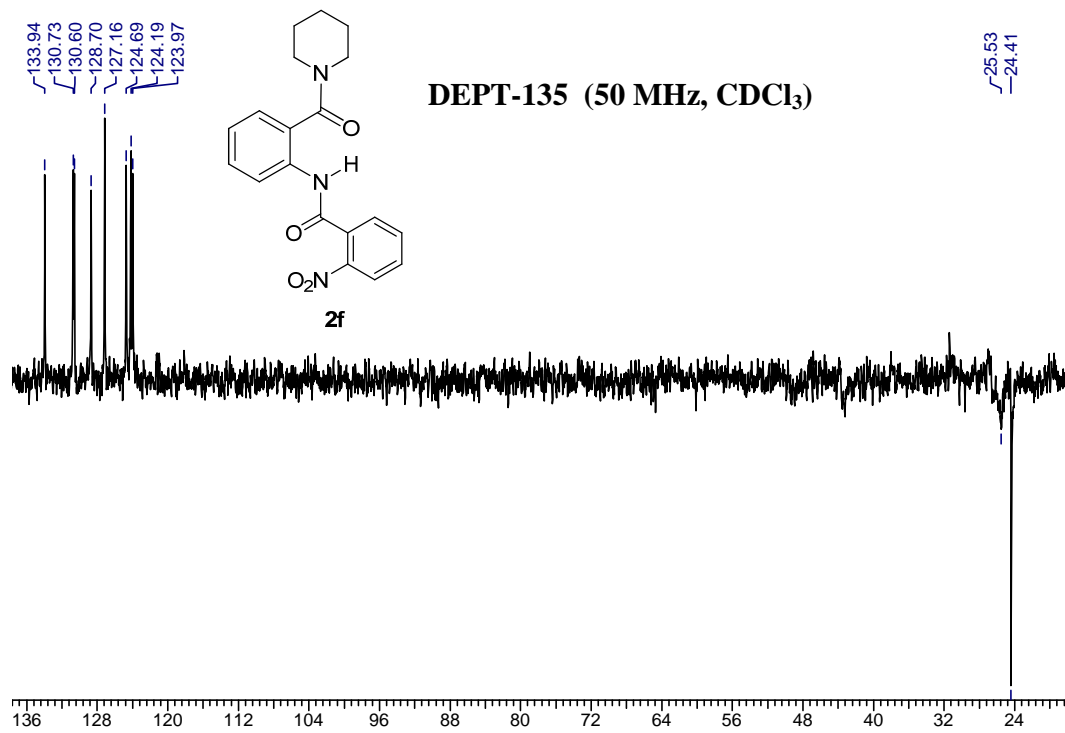



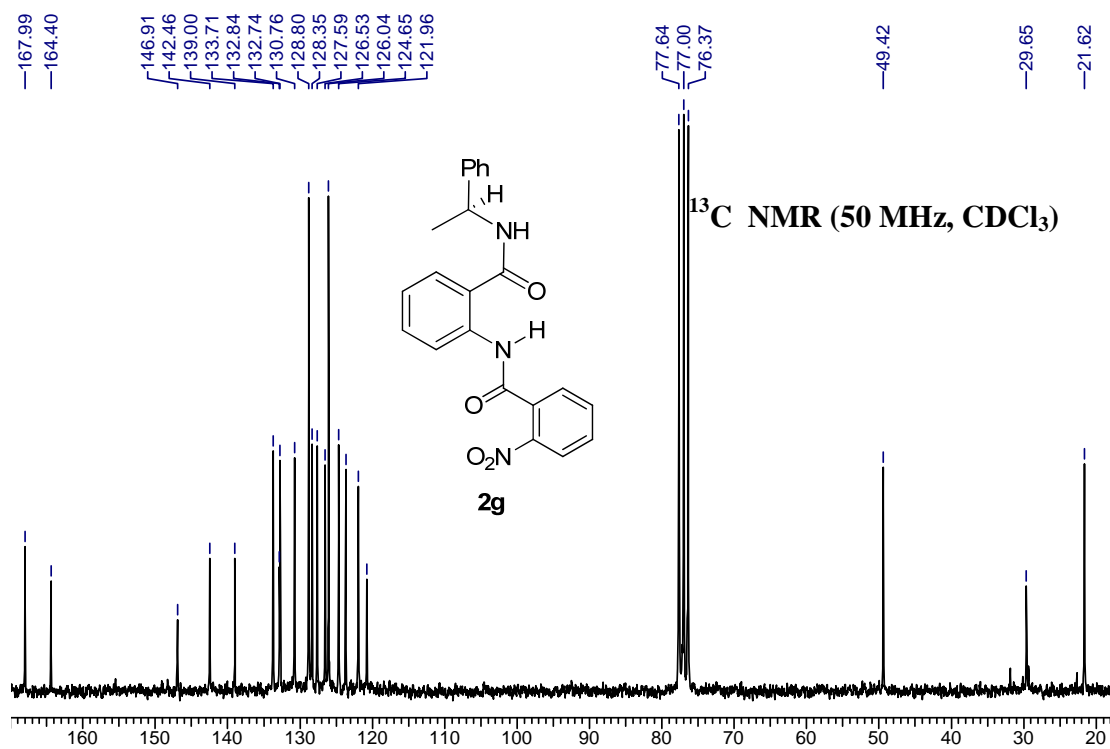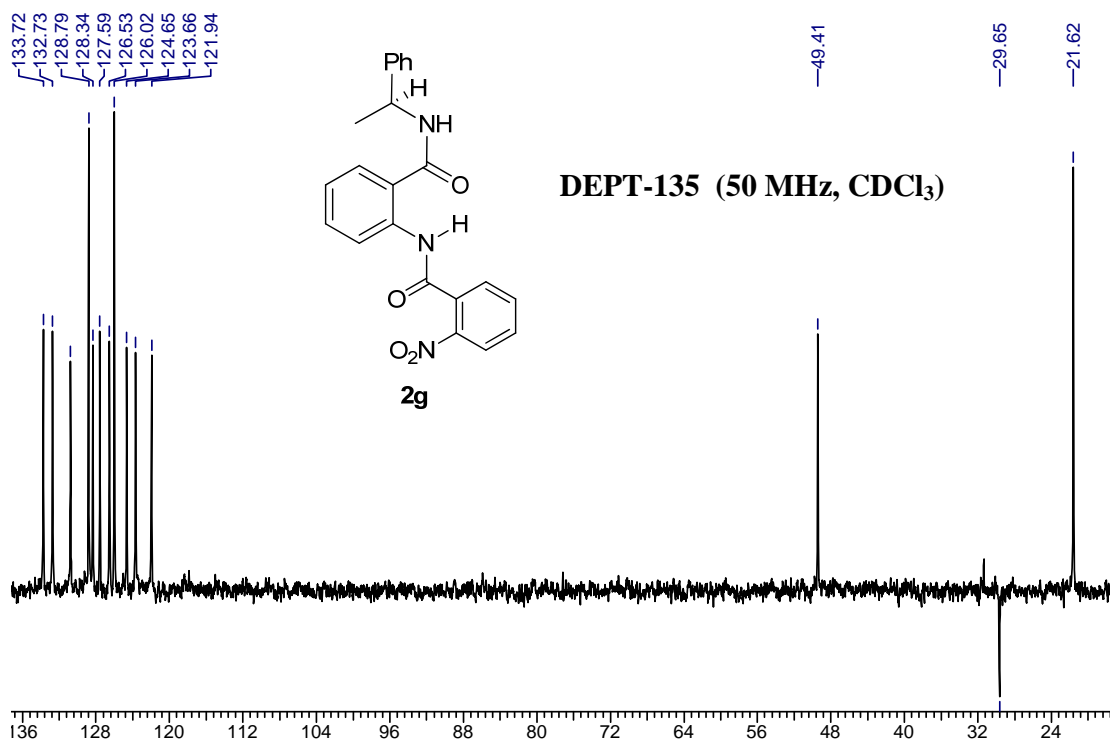

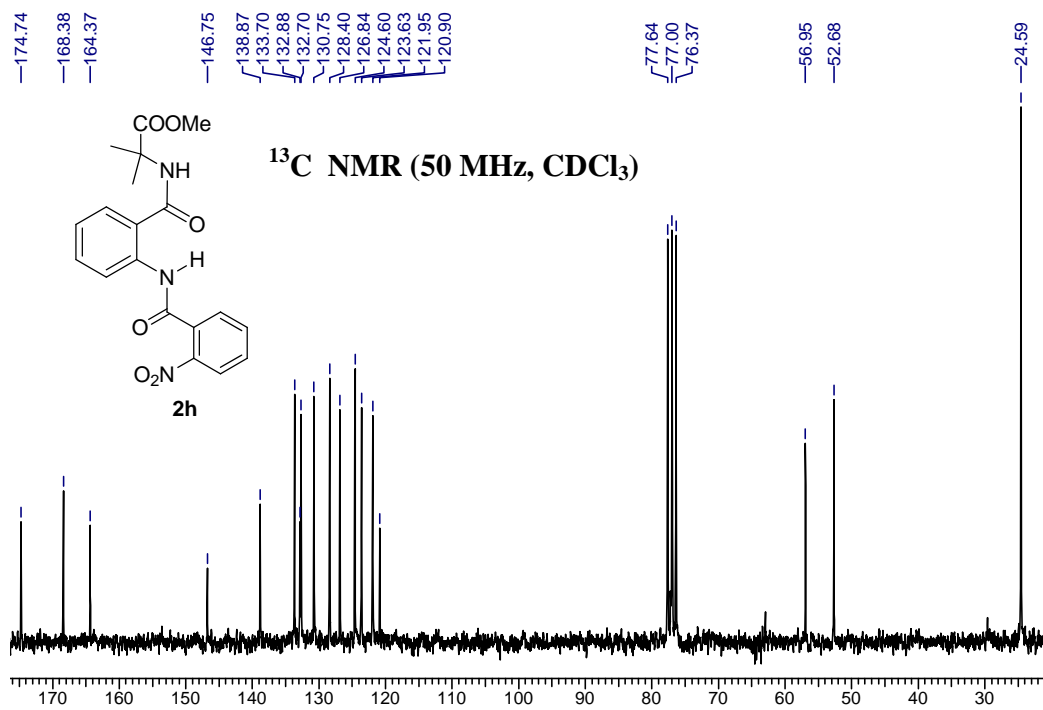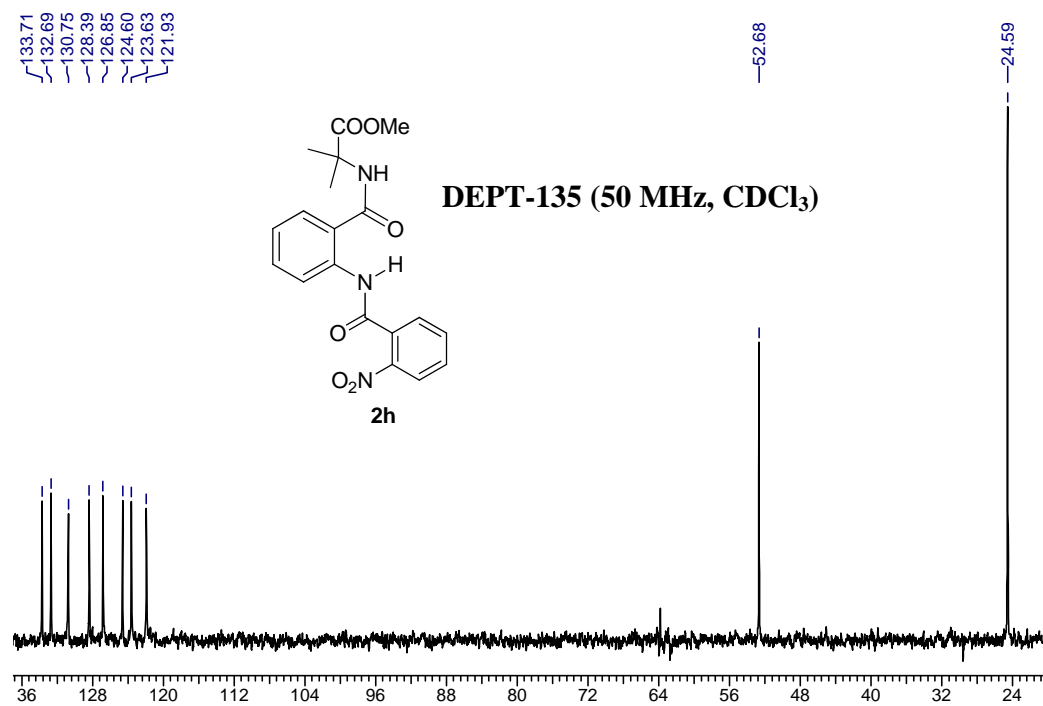

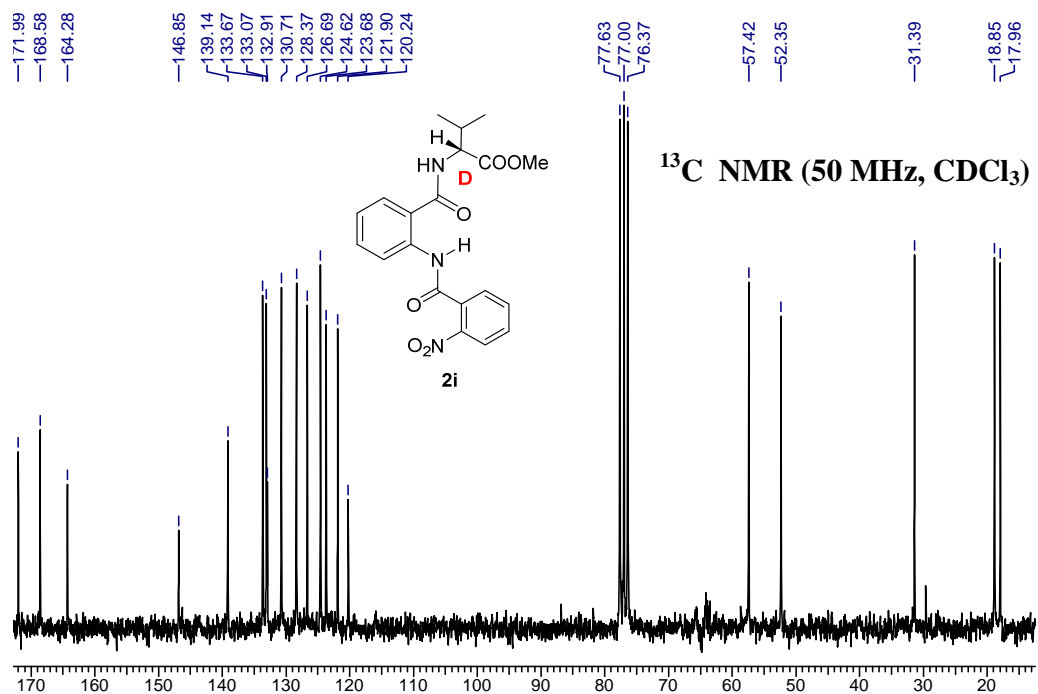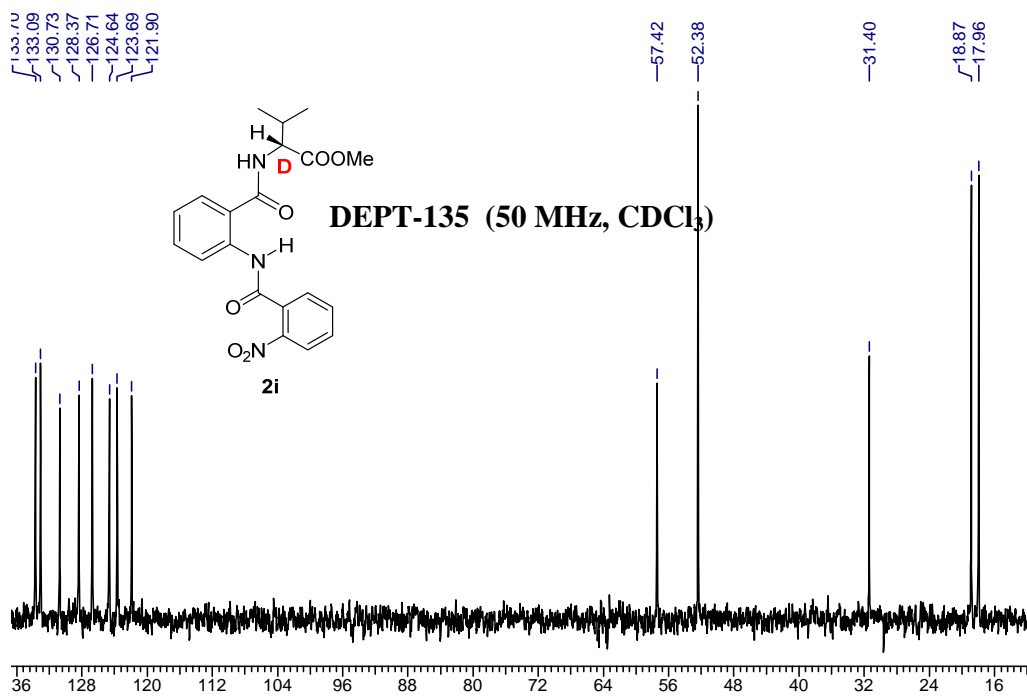

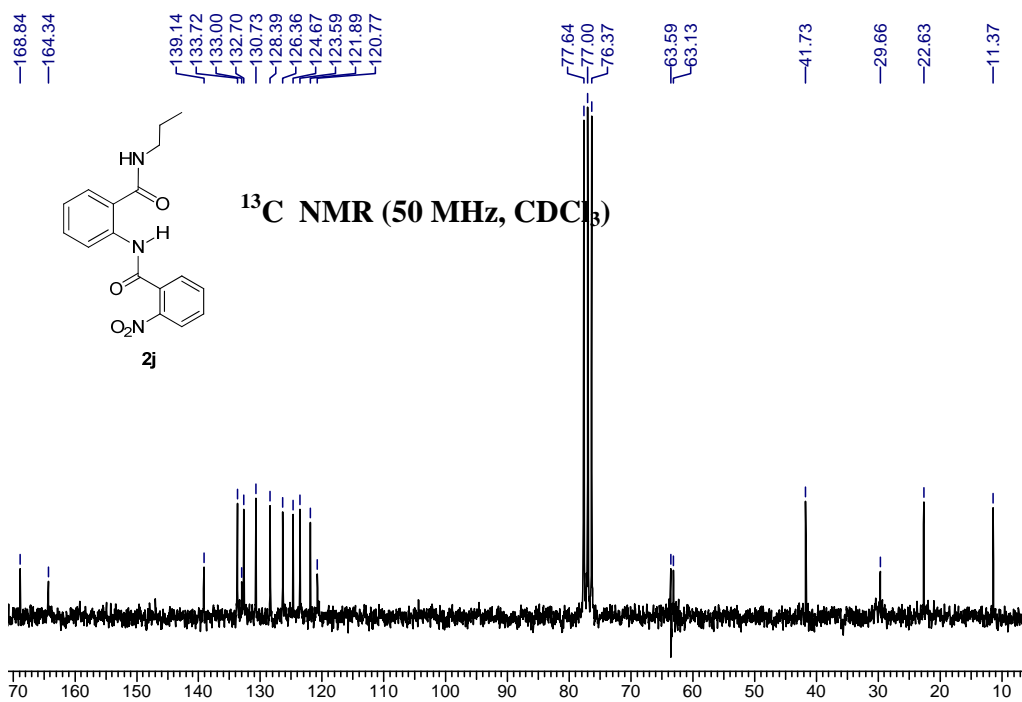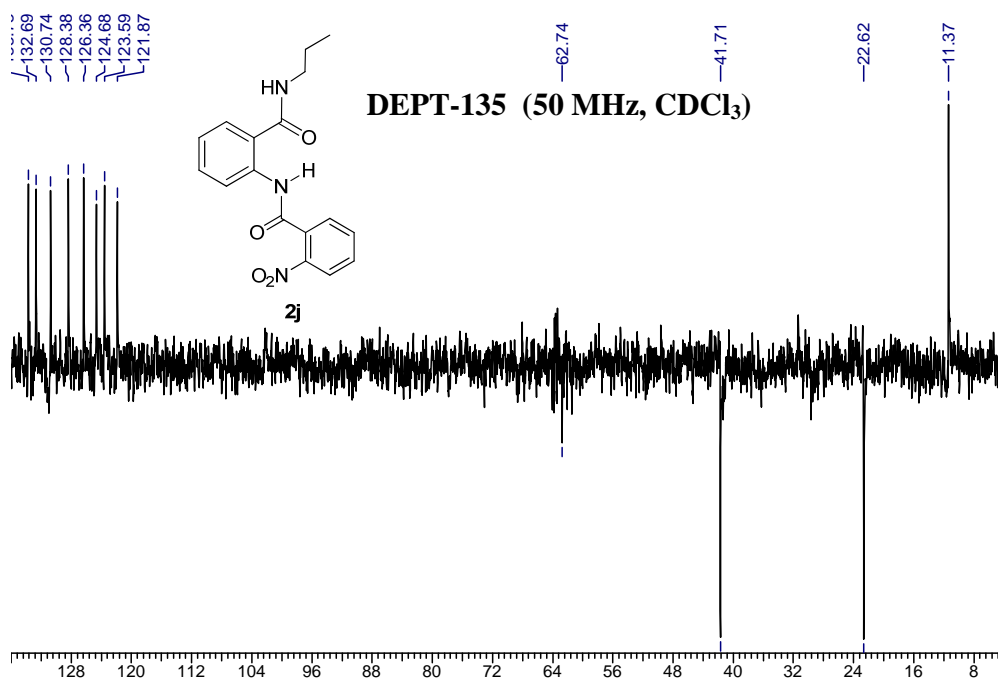

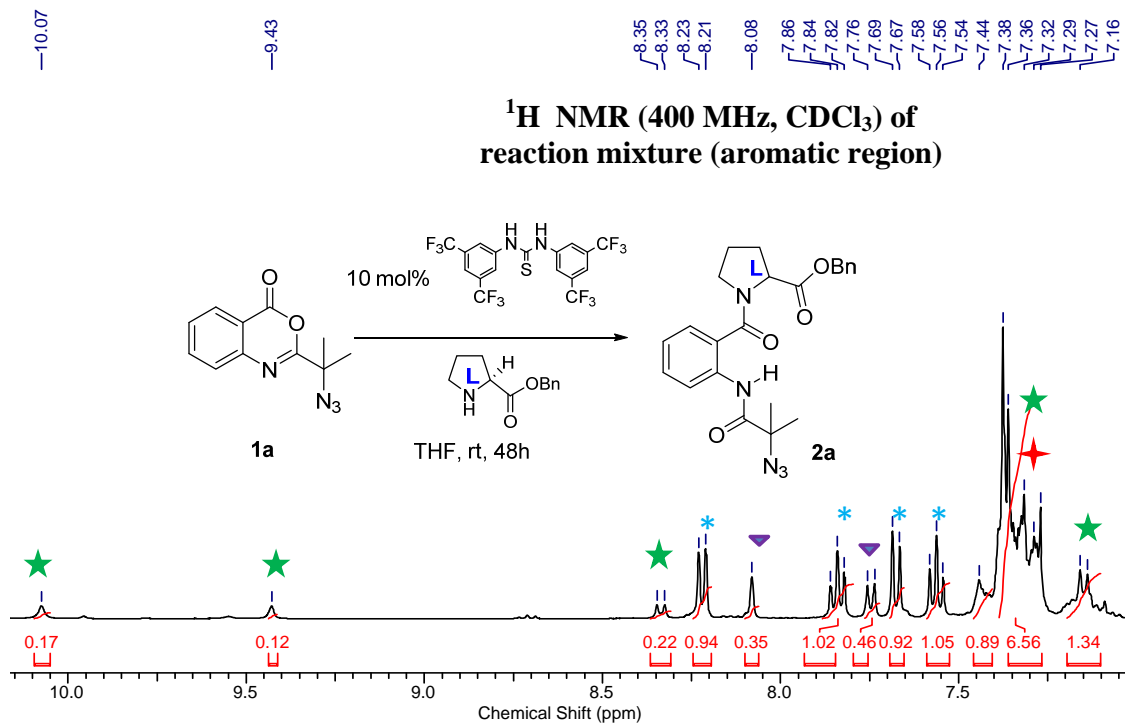

**Note:** The compounds are labeled using different symbols, *i.e.* Product **2a** (★), Oxazinone **1a** (\*), thiourea (▼) and H-<sup>L</sup>Pro-OBn (+).

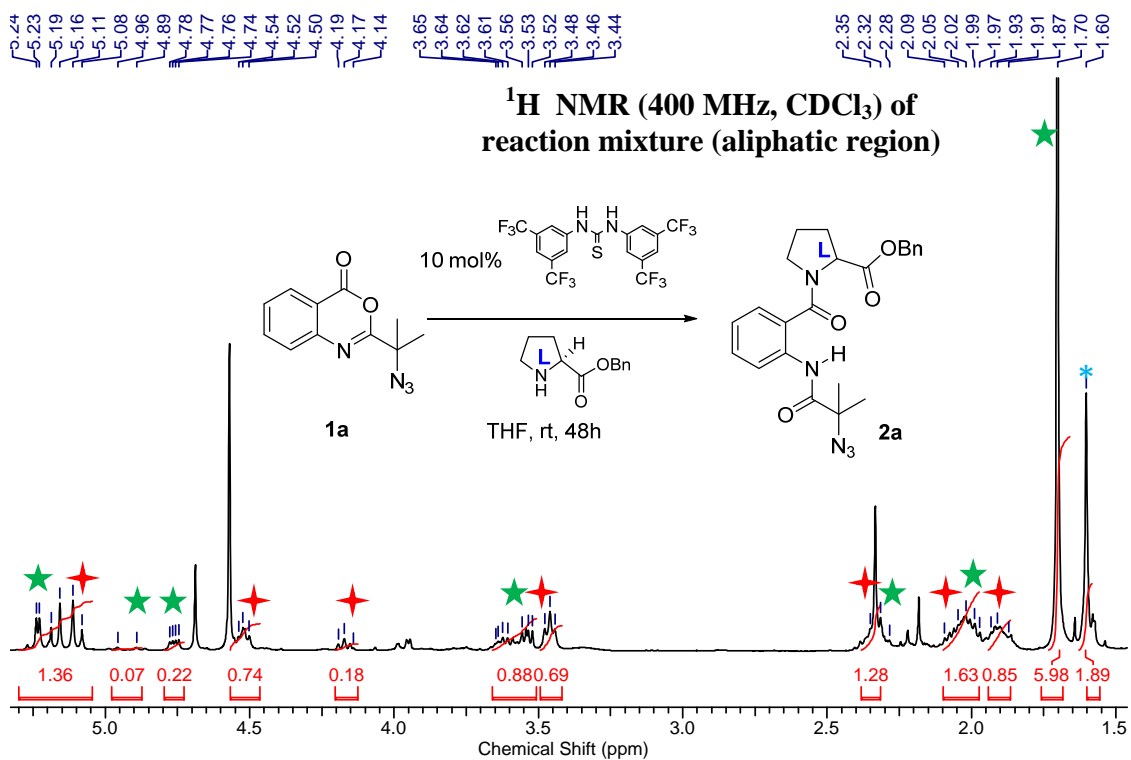

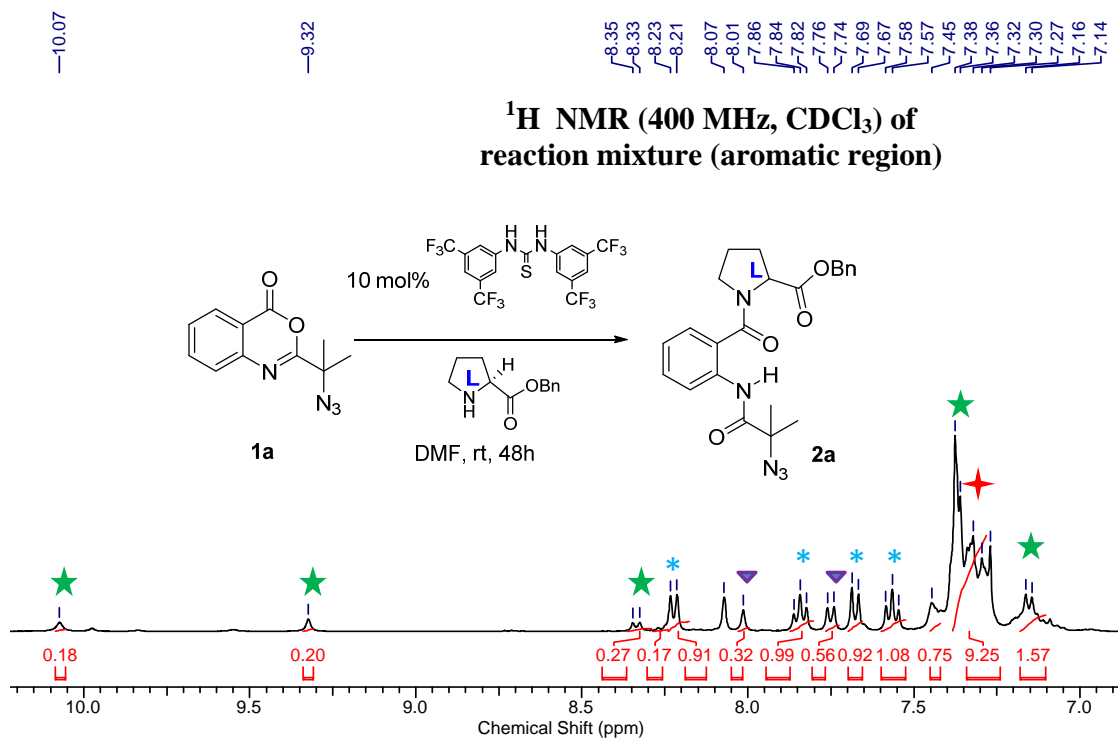

**Note::** The compounds are labeled using different symbols, *i.e.* Product **2a** (★), Oxazinone **1a** (\*), thiourea (▼) and H-<sup>1</sup>Pro-OBn (✚).

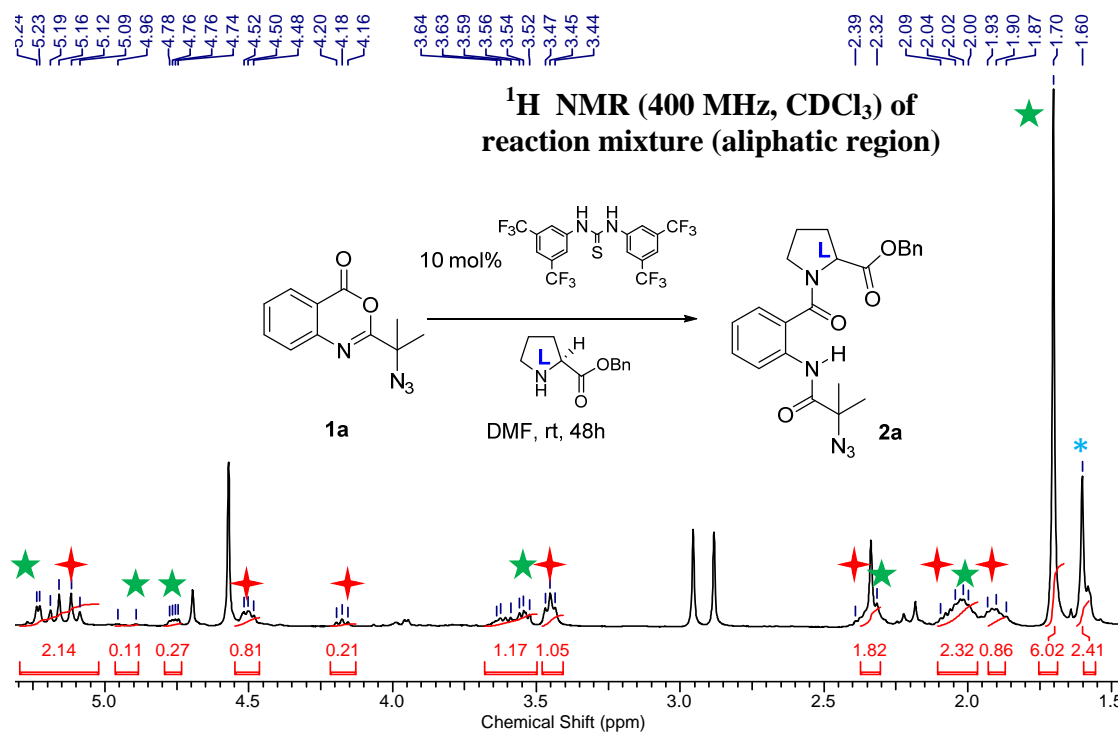

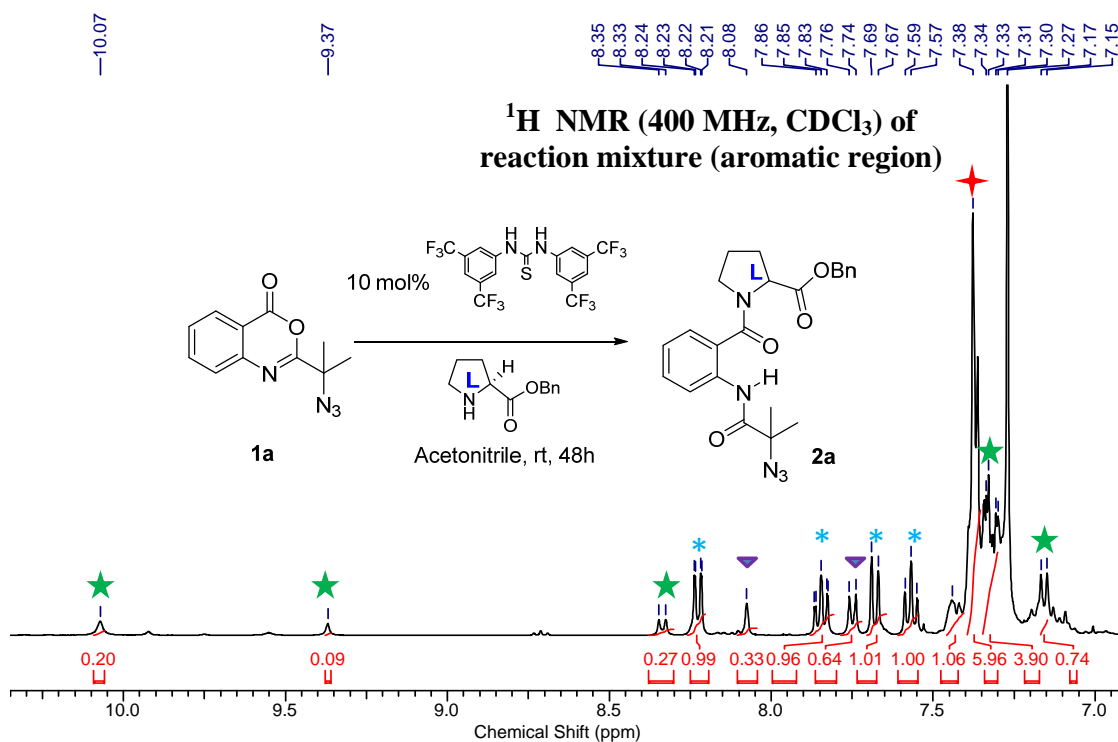

**Note:** The compounds are labeled using different symbols, *i.e.* Product **2a** (★), Oxazinone **1a** (\*), thiourea (♣) and H-L-Pro-OBn (♣).

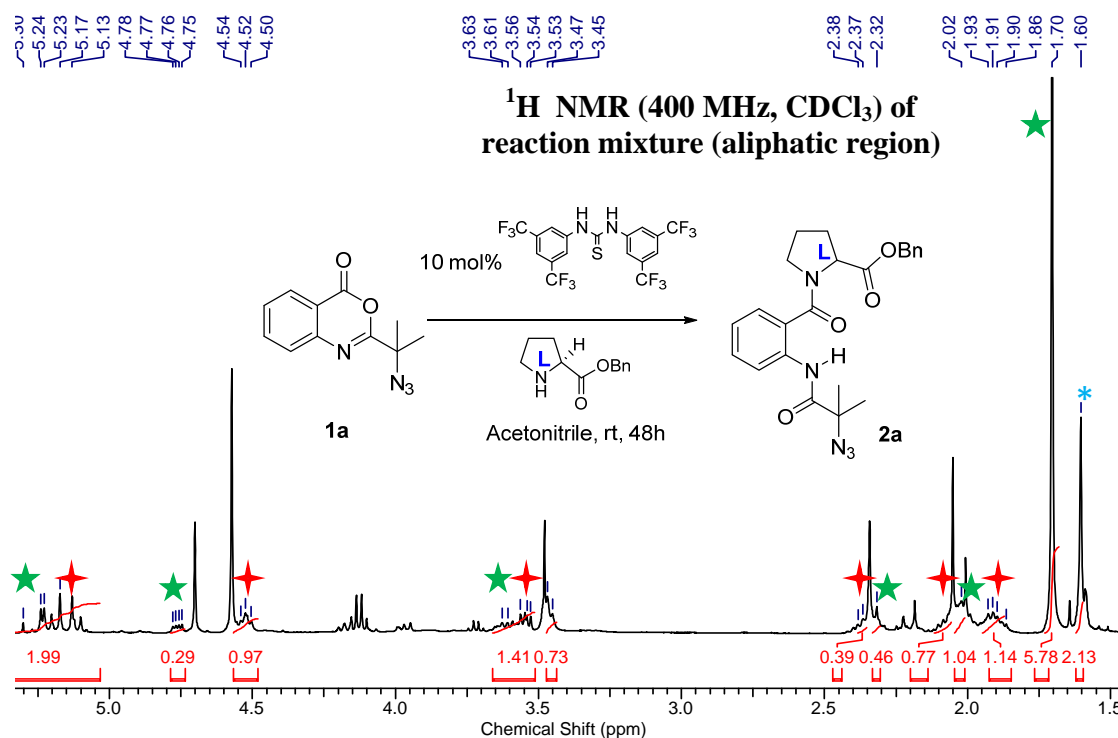

Supplement: c3ra45903a.pdf [file c3ra45903a.pdf]
